# Supplementary material for: Earthquake and typhoon trigger unprecedented transient shifts in shallow hydrothermal vents biogeochemistry
Source: Sci Rep. 2019 Nov 15;9:16926. doi: 10.1038/s41598-019-53314-y (PMC6858458; doi:10.1038/s41598-019-53314-y)
Supplement: Supplementary file 1 — Appendix S1 [file 41598_2019_53314_MOESM1_ESM.xlsx]

## Sheet: Mapping
SPRING 2000 (April)
METADA									SEAWATER CARBON CHEMISTRY			MAJORS											MINORS
Sample	LAT	LONG	Depth	Sal	Temp	P	Nitrate		DIC	TA		Mg	Cl	Br	Ca	K	Sr	B	Si	P	Na		Li	Rb	Mo	Cd	Sb	Cs	Ba	Tl	Pb	U	Al	V	Cr	Mn	Fe	Cu	Zn	As
						μmol/L	μmol/L		μmol/kg	μmol/kg		mM	mM	mM	mM	mM	µM	µM	µM	µM	mM		µM	µM	µM	nM	nM	nM	µM	nM	nM	nM	µM	µM	µM	µM	µM	µM	µM	µM
1				33.908	18.8	0.05	0.643					44	481		8.6	8.5					400					0.244662					7.74252		4.7109			0.106318	0.09125	0.00425781	0.0278846
2				33.924	18.16	0.05	1.101					48	490		9	9					420					0.255783					7.33229		3.41364			0.0426818	0.0555357	0.00789063	0.0409615
6				33.88	17.58	0.05	0.619					50	510		9.5	9.3					440					0.233541					8.47852		3.31171			0.127682	0.0497321	0.00308594	0.0382692
9				33.902	17.38	0.05	1.327					52	540		10	9.5					460					0.186833					11.6397		4.7109			0.0504091	0.0439286	0.00941406	0.0559615
10				33.92	16.62	0.05	0.847					55	560		10.6	10.5					480					0.186833					4.52099		3.41364			0.0590455	0.0363393	0.00164062	0.0586538
1				34.169	22.3	0.0567601	0.573765					51.5	520		10.5	9.6					478.5					0.255783					4.16667		3.31171			0.141576	0.238675	0.00160897	0.0124235
6				34.169	22.6	0.0567601	0.306307					51	525		9.75	9.4					455.6					0.124555					2.66908					0.146585	0.463384	0.00246263	0.0190749
9				34.21	22.6		0.638762					53.5	530		9.26	9.2					421.4					0.120107					4.29952					0.0983151	0.227932	0.0056491	0.0516437
1				34.169	22.3	0.0567601	0.573765					54.5	490		9.77	8.65					411.7					0.255783					4.16667					0.141576	0.238675	0.00160897	0.0124235
6				34.169	22.6	0.0567601	0.306307																			0.124555					2.66908					0.146585	0.463384	0.00246263	0.0190749
9				34.21	22.6		0.638762																			0.120107					4.29952					0.0983151	0.227932	0.0056491	0.0516437
1				34.1915	22.2223		0.410153																			0.077847					0.722222					0.0082878		0.0103304
2				34.1815	22.2446		1.2835																			0.077847					1.67874					0.0126594	0.0108326	0.00230527
9				34.1638	22.2777		0.475896																			0.117883					18.7077					0.130647		0.0206373
10				34.1636	22.4259	0.0567601	1.30293																			0.0622776					12.6691					0.0129781	0.008	0.00505901
1				34.1915	22.2223		0.410153																			0.077847					0.722222					0.0082878		0.0103304
2				34.1815	22.2446		1.2835																			0.077847					1.67874					0.0126594	0.0108326	0.00230527
9				34.1638	22.2777		0.475896																			0.117883					18.7077					0.130647		0.0206373
10				34.1636	22.4259	0.0567601	1.30293																			0.0622776					12.6691					0.0129781	0.008	0.00505901
SUMMER 2010 (August)
METADA									SEAWATER CARBON CHEMISTRY			MAJORS											MINORS
Sample	LAT	LONG	Depth	Sal	Temp	P	Nitrate		DIC	TA		Mg	Cl	Br	Ca	K	Sr	B	Si	P	Na		Li	Rb	Mo	Cd	Sb	Cs	Ba	Tl	Pb	U	Al	V	Cr	Mn	Fe	Cu	Zn	As
						μmol/L	μmol/L		μmol/kg	μmol/kg		mM	mM	mM	mM	mM	µM	µM	µM	µM	mM		µM	µM	µM	nM	nM	nM	µM	nM	nM	nM	µM	µM	µM	µM	µM	µM	µM	µM
various	24.8343	121.96	1	34.4	23.8	0.0488921	2.39565		2217.55	2230.16		53.75			11	10.4103					471.913					6.37367	9.11576		0.16378		50.4223					0.32745	15.714	0.22783	0.98374	0.38181
various	24.8343	121.96	1	34.4	21.8	0.149669	5.91186		2049.96	2232.87		53.3333			10.6	10.8205					470.174					6.19662	6.69869		0.15856		38.1289					0.29199	15.714	0.15513	1.02178	0.20378
various	24.8344	121.969	1	34.3	24.4	0.139	0.780628		2280.03	2225.74		52.25			9.8	10.5128					458.957					5.84253	6.20854		0.07189		42.4508					0.32491	15.714	0.01504	2.38078	0.102
various	24.8344	121.969	1	34.4	21.4	0.220316	5.84548		2096.05	2194.38		44.6667			9.65	9.71795					400.87					9.27847	9.14943		0.08232		38.417					0.19574	17.857	0.03228	0.83677	0.11486
various	24.8343	121.97	1	34.3	23.6	0.189	1.14851		2094.39	2298.07		53.25			10.1	10.2051					459.739					7.08185	11.11		0.08653		40.3378					0.51921	17.857	0.08649	0.80056	0.20961
various	24.8343	121.97	1	34.3	21.5	0.230804	4.40462		2077.39	2259.61		47.25			9.15	9.53846					413.217					4.78025	7.35222		0.07145		26.6038					0.09082	16.429	0.05516	0.6399	0.102
various	24.8342	121.974	1	34.3	24.3	0.222	0.688765		2075.73	2017.29		53			10.35	10.0513					465.739					5.66548	4.86782		0.06986		22.0898					0.4378	11.429	0.51145	1.25029	0.32725
various	24.8342	121.974	1	34.3	20.6	0.232828	6.36314		2040.89	2216.63		51.9167			9.7	9.74359					458.609					5.31139	6.04516		0.15204		48.4054					0.33251	11.071	0.39925	2.24081	0.4439
various	24.8338	121.976	1	34.3	24.2	0.219	0.661671		2117.76	2092.38		49.75			9.65	8.92308					429.565					5.66548	9.47619		0.0858		38.9932					0.20443	15	0.29991	2.29992	0.49246
various	24.8338	121.976	1	34.3	20.3	0.175142	2.68648		2157.85	2277.39		45.9167			8.85	8.97436					407.826					6.01957	7.67898		0.09001		34.8634					0.20081	9.286		0.74062	0.19184
various	24.8335	121.977	1	34.2	24.6	0.139	0.506308		2120.39	2132.81		47.0833			9.3	8.92308					415.13					5.66548	7.35222		0.10783		23.8407					0.27245	9.286	0.15951	1.31997	0.29187
various	24.8335	121.977	1	34.2	20.7	0.253068	6.13564		2119.28	2267.27		54.25			10.85	9.84615					467.217					5.31139	3.59442		0.07305		30.5415					0.10203	17	0.22909	1.04216	0.46831
SPRING 2011 (May)
METADA									SEAWATER CARBON CHEMISTRY			MAJORS											MINORS
Sample	LAT	LONG	Depth	Sal	Temp	P	Nitrate		DIC	TA		Mg	Cl	Br	Ca	K	Sr	B	Si	P	Na		Li	Rb	Mo	Cd	Sb	Cs	Ba	Tl	Pb	U	Al	V	Cr	Mn	Fe	Cu	Zn	As
						μmol/L	μmol/L		μmol/kg	μmol/kg		mM	mM	mM	mM	mM	µM	µM	µM	µM	mM		µM	µM	µM	nM	nM	nM	µM	nM	nM	nM	µM	µM	µM	µM	µM	µM	µM	µM
seawater1	24.8333	121.946	1	34.244	24.3							52.9			10.5	11.2					461					1.29			0.08		13.8					1	4.19			0.04
seawater2	24.8314	121.965	1	34.252	24.3							55.5			10.6	10.9					451					1.47			0.12		22.4					1.09	3.21			0.05
seawater3	24.8352	121.965	1	34.225	24.1							54.7			10.8	10.6					453					1.21			0.08		18.2					1.13	3.49			0.07
seawater4	24.8319	121.965	1	34.227	24.3							52.6			10.8	10.6					449					1.24			0.08		19					0.84	2.53			0.05
seawater5	24.8318	121.964	1	34.221	24.3							53.6			10.3	12.5					451					1.24			0.1		20.7					1.01	3.58			0.06
seawater6	24.8318	121.957	1	34.231	24.3							52.8			10.6	11.5					440					1.38			0.12		16					0.89	2.21			0.06
seawater7	24.8311	121.953	1	34.227	23.9							53.4			10.9	11.4					445					1.47			0.09		14					0.78	2.64			0.03
seawater8	24.8307	121.948	1	34.22	24.2							51.1			10.9	11.2					453					1.2			0.1		22.8					0.92	2.14			0.05
seawater9	24.8289	121.953	1	34.234	24.2							55.5			10.9	11.1					455					1.44			0.09		12.6					0.81	2.37			0.03
seawater10	24.83	121.96	1	34.247	24.1							54			11	11.1					454					1.34			0.12		32					0.87	1.96			0.02
seawater11	24.8272	121.967	1	34.247	24							54.7			11.2	11.1					453					1.37			0.12		26.1					0.82	2.32			0.02
seawater12	24.8273	121.955	1	34.259	23.9							53.9			10.9	10.9					449					0.94			0.09		15.7					1.19	7.74			0.05
seawater13	24.8326	121.973	1	34.264	24.1							54.9			11.2	10.9					453					1.4			0.09		14.6					0.79	3.64			0.03
seawater14	24.8299	121.98	1	34.242	23.9							55.1			10.9	10.7					447					1.34			0.09		19					0.78	2.17			0.03
seawater15	24.828	121.971	1	34.241	24.1							53.6			10.9	10.9					452					1.99			0.11		23.3					0.79	3.89			0.03
SPRING 2016 (April)
METADA									SEAWATER CARBON CHEMISTRY			MAJORS											MINORS
Sample	LAT	LONG	Depth	Sal	Temp	P	Nitrate		DIC	TA		Mg	Cl	Br	Ca	K	Sr	B	Si	P	Na		Li	Rb	Mo	Cd	Sb	Cs	Ba	Tl	Pb	U	Al	V	Cr	Mn	Fe	Cu	Zn	As
						μmol/L	μmol/L		μmol/kg	μmol/kg		mM	mM	mM	mM	mM	µM	µM	µM	µM	mM		µM	µM	µM	nM	nM	nM	µM	nM	nM	nM	µM	µM	µM	µM	µM	µM	µM	µM
KST	24.847	121.945	1	30.9	24.38	0.184	6.319		2038.57	2206.17		54.2856	563.305	0.842779	10.5857	10.4293	88.3694	425.07	4.81666	0.059471	484.102		24.8571	1.32105	0.120102	1.85035	3.72043	2.35515	0.0841058	0.0778569	6.06178	13.8728	0.61799	0.0346106	0.00969305	0.0498198	0.439896	0.584565	1.74723	0.0203812
KST	24.852	121.953	1	31.3	24.5	0.058	4.928		2075.35	2173.55		51.8926	538.245	0.812769	10.05	9.91889	83.5627	406.128	4.33891	0.0782419	461.006		24.4562	1.30429	0.118206	0.427004	1.94645	2.46802	0.0535437	0.0489285	5.95077	13.5703	1.09533	0.0307768	0.0281752	0.0439404	0.385227	0.0585257	0.209238	0.0193802
KST	24.845	121.961	1	32.5	23.7	0.172	5.412		2190.29	2127.77		53.6209	562.715	0.859034	10.3024	10.6559	85.7812	423.76	9.5785	0.0677387	481.907		23.3347	1.24129	0.11238	0.533756	1.82326	2.38525	0.0468808	0.0538213	8.5473	13.5661	1.50695	0.0307238	0.00528887	0.0352943	1.08787	0.163564	0.460951	0.0210085
KST	24.84	121.966	1	32.6	23.07	0.237	1.99		2234.33	2060.41		51.8926	535.38	0.799014	9.97424	9.8472	82.7	404.416	7.33072	0.0911226	456.902		25.3128	1.33351	0.123187	0.346941	2.08607	2.46802	0.0513082	0.0244642	3.63417	14.8559	0.595716	0.0353703	0.011347	0.0257381	0.496374	0.0261809	0.0953503	0.0280692
KST	24.84	121.968	1	34.1	24.34	0.103	6.2025		2045.17	2051.64		57.4319	599.152	0.890294	10.7456	11.0372	90.5879	444.313	8.39017	0.0537581	508.486		23.1419	1.2293	0.110786	2.68657	1.95466	2.01655	0.0437132	0.0587142	3.40251	13.4358	0.309514	0.0300524	0.00630818	0.00992027	0.117271	0.0355211	0.28729	0.0190865
KST	24.84	121.971	1	32.4	23.27	0.077	5.78		2081.82	2129.45		52.0698	543.358	0.81652	10.1313	10.0823	83.8092	408.748	6.78248	0.0430774	463.297		26.2098	1.39338	0.133055	0.702778	2.22569	2.40783	0.0596168	0.0538213	7.16699	15.0828	1.22579	0.0343986	0.0179822	0.0230624	0.44072	0.145811	0.446161	0.0221564
KST	24.837	121.964	1	32.4	23.27	0.117	1.4005		2122.17	1818.9		60.3567	644.242	0.944062	11.4412	11.7513	95.5179	454.187	8.23532	0.0935	549.094		26.1241	1.40328	0.133774	0.578235	2.86629	2.79157	0.0615392	0.0293571	7.70753	14.8265	1.41878	0.0449991	0.0224248	0.0437584	2.28719	0.0750991	0.13576	0.0400016
KST	24.835	121.966	1	32.09	24.34	0.096	2.0165		2043.97	2069.62		62.2179	650.086	0.976573	11.4973	12.1929	96.1341	477.964	9.21182	0.0699742	553.102		23.1356	1.24471	0.112589	0.382525	1.88896	2.38525	0.046575	0.0342499	2.55792	13.3476	0.662948	0.0312008	0.00513501	0.102297	0.205032	0.0224385	0.096268	0.0228504
KST	24.834	121.969	1	32.42	23.49	0.098	2.5975		2054.69	2185.3		52.6016	544.847	0.81777	10.1706	10.0967	85.0417	413.987	7.58135	0.0294161	465.492		22.9182	1.23911	0.134066	0.596027	2.06965	2.08427	0.042701	0.0440356	7.09459	13.5829	0.370335	0.0312538	0.00494269	0.0127416	1.07395	0.0559155	0.233818	0.0209551
KST	24.835	121.962	1	33.62	23.52	0.094	0.263		2214.86	2029.52		52.4687	548.78	0.812769	10.2519	10.1454	83.8092	411.065	8.69349	0.0895258	469.595		22.8841	1.24309	0.147655	0.346941	2.30782	2.65613	0.0449729	0.0342499	0.617761	13.3728	0.565657	0.0301938	0.00759674	0.114402	0.770382	0.0169193	0.0829306	0.0368116
KST	24.833	121.963	1	33.8	25.17	0.082	3.7765		2169.77	2185.62		53.0448	545.128	0.820271	10.2688	10.1598	85.4115	416.304	15.1705	0.0866516	469.452		24.2935	1.3157	0.121624	0.773946	2.1682	2.22724	0.0548253	0.0587142	5.15927	14.1039	1.30307	0.0467129	0.023271	0.0463067	1.46837	0.308699	0.397675	0.0232642
KST	24.831	121.963	1	33.1	23.77	0.105	6.0425		2212.33	2182.07		56.6786	585.189	0.87779	10.8746	10.9971	89.6019	440.485	9.55144	0.140906	503.523		23.2174	1.26751	0.1198	0.622715	1.9136	2.12942	0.0682677	0.0293571	3.64865	13.9568	1.3995	0.042084	0.00976998	0.0278132	1.2496	0.0435876	0.137412	0.0212888
KST	24.834	121.969	1	33	24.91	0.086	2.86		2531.39	2181.31		54.7287	564.456	0.852782	10.6418	10.7419	87.7532	430.208	11.1449	0.0925419	488.778		23.3755	1.28097	0.119737	0.604923	2.06965	2.28743	0.0563837	0.0244642	5.40541	13.94	2.22568	0.0357413	0.0108278	0.0351851	0.868404	0.0407101	0.132273	0.0237047
KST	24.833	121.959	1	32.69	25.26	0.372	6.461		2136.45	2179.97		55.7037	573.109	0.867787	10.7007	10.825	88.1229	431.316	13.2517	0.128026	493.025		24.1313	1.31708	0.119373	0.462588	2.06965	2.16704	0.0544467	0.0538213	4.60425	14.3643	0.60739	0.0325965	0.00696207	0.010794	0.254186	0.0625983	0.228373	0.0209418
KST	24.831	121.959	1	32.56	24.75	0.122	5.942		2191.36	2174.34		56.5013	582.296	0.870288	10.8213	10.891	89.9717	435.044	11.2816	0.085871	499.896		23.3929	1.28446	0.14679	0.444796	2.11892	2.74944	0.0499902	0.0440356	3.47973	13.7341	0.701308	0.035653	0.00690438	0.37942	0.764133	0.0213064	0.242658	0.0206748
KST	24.836	121.955	1	32.77	24.09	0.115	5.518		2376.22	2119.53		54.3742	562.63	0.84528	10.4174	10.5125	86.7672	422.853	11.9281	0.0270387	482.527		23.9631	1.31959	0.122728	1.04972	2.22569	3.06998	0.0618888	0.0244642	7.46139	14.1249	1.77121	0.0407943	0.0271559	0.0603407	1.37934	0.132603	0.213169	0.0246256
KST	24.834	121.954	1	32.56	24.64	0.044	2.9335		2141.85	2206.21		56.1468	589.909	0.889044	10.5829	10.9713	88.3694	432.021	11.5991	0.121	506.052		23.4099	1.28384	0.115736	0.28467	1.90539	2.18962	0.058124	0.0342499	1.32722	13.8476	0.747674	0.0319605	0.00542349	0.0154538	0.347318	0.0155356	0.231676	0.0206348
KST	24.832	121.954	1	32.41	24.72	0.058	0.5305		2193.04	2185.83		54.2856	564.26	0.84778	10.437	10.567	87.2602	424.566	12.4137	0.107481	484.531		22.6935	1.24404	0.112255	0.249086	1.74113	3.25809	0.0520874	0.0489285	0.897683	13.3182	2.16263	0.0236744	0.00398108	0.235374	0.175611	0.0107711	0.145411	0.016991
KST	24.836	121.945	1	32.59	24.07	0.048	0.8035		2061.59	2191.36		52.9118	545.465	0.822772	10.1313	10.2601	83.686	410.662	6.66892	0.084771	468.068		22.4389	1.23758	0.113672	0.444796	1.70007	2.05418	0.0465677	0.0489285	4.97587	13.5451	0.363478	0.0304941	0.00332718	0.00893735	0.0485988	0.154994	0.364576	0.0200075
KST	24.834	121.943	1	32.47	24.57	0.072	2.073		2090.2	2221.45		52.2028	544.341	0.821522	10.1538	10.0508	84.179	409.252	11.282	0.0904839	463.058		22.3993	1.25462	0.119685	0.471484	2.00394	2.0918	0.0485265	0.0489285	7.0222	13.6291	0.761869	0.0317132	0.00507731	0.00939241	0.63678	0.117193	0.426124	0.0196204
KST	24.833	121.941	1	32.39	24.61	0.084	2.203		2032.36	2196.69		53.1777	551.196	0.827774	10.3024	10.2286	85.658	415.7	10.1189	0.0734516	470.979		23.949	1.32893	0.117872	0.346941	1.9136	2.90444	0.0478784	0.0538213	4.32432	14.3433	0.980579	0.0296107	0.00638511	0.0532782	0.298218	0.214432	0.30702	0.0207549
KST	24.839	121.941	1	32.58	23.87	0.091	2.261		2043.49	2173.01		55.8809	577.239	0.875289	10.6025	10.8222	87.9997	433.936	7.7419	0.0647226	491.641		22.219	1.23111	0.124594	0.560443	2.07786	2.14447	0.0440773	0.0538213	7.93436	13.4863	0.71491	0.028692	0.00646204	0.0148349	0.24448	0.144836	0.461808	0.0194469
KST	24.842	121.938	1	32.5	24	0.039	1.615		2050.57	2177.36		52.6459	544.173	0.819021	10.165	10.1684	83.9325	409.957	1.47633	0.129445	468.116		22.3308	1.2609	0.113943	0.400317	1.78219	2.21219	0.046808	0.0538213	4.62838	13.814	0.63011	0.028162	0.00336564	0.0146165	0.0704092	0.210909	0.300811	0.0197939
KST	24.847	121.934	1	32.11	24.49	0.051	0.314		2046.61	2173.75		53.9754	557.798	0.84778	10.3192	10.4494	85.658	415.297	5.0712	0.0954161	477.183
KST_extra	24.847	121.939	1	30.95	24.35	0.181	5.9		2036.4	2202.46
KST_extra	24.859	121.956	1	31.24	25.65	0.193	3.45		2045.56	2199.56
KST_extra	24.85	121.961	1	32.45	23.9	0.165	2.23		2095.3	2131.4
KST_extra	24.842	121.961	1	33.45	23.22	0.22	1.87		2136.5	2063.4
KST_extra	24.844	121.963	1	33.48	23.15	0.18	2.76		2139.22	2069.67
KST_extra	24.849	121.966	1	33.66	23.18	0.21	2.45		2134.56	2059.66
KST_extra	24.841	121.974	1	32.45	23.45	0.123	6.1		1995.56	2043.77
KST_extra	24.837	121.964	1	32.405	23.31	0.13	5.95		2033.5	2099.45
KST_extra	24.835	121.967	1	32.23	24.12	0.172	1.76		2099.3	2166.5
KST_extra	24.834	121.971	1	32.19	24.05	0.144	2.54		2044.3	2199.65
KST_extra	24.829	121.963	1	33.76	25.05	0.084	2.3		2115.67	2187.65
KST_extra	24.828	121.963	1	33.55	24.77	0.19	0.56		2119.87	2191.45
KST_extra	24.836	121.959	1	33	24.76	0.091	5.55		2151.4	2182.45
KST_extra	24.829	121.958	1	32.43	24.33	0.155	5.75		2194.2	2173.6
KST_extra	24.843	121.928	1	34.5	24.67	0.07	3.33		2099.23	2292.45
KST	24.847	121.945	10	32.4	23.09	0.314	4.5		2118.36	2245.23
KST	24.852	121.953	20	31.94	21.06	0.158	5.628		2187.59	2216.29
KST	24.845	121.961	10.4	32.83	22.67	0.302	6.322		2158.52	2179.87
KST	24.84	121.966	16.6	32.9	22.67	0.337	2.69		2374.2	2101.69
KST	24.84	121.968	24.4	32.78	21.98	0.203	6.9025		2172.27	2152.46
KST	24.84	121.971	35.7	33.12	22.78	0.207	6.69		2124.22	2173.82
KST	24.84	121.964	8.7	33.12	22.78	0.247	2.3105		2549.02	1990.07
KST	24.835	121.966	17.9	32.91	22.21	0.196	2.7165		2263.77	1837.93
KST	24.834	121.969	30.2	32.81	20.67	0.228	3.5075		2168.89	2190.2
KST	24.835	121.962	11	34.09	23.27	0.194	0.963		2217.09	2093.7
KST	24.833	121.963	29.9	33.81	20.75	0.212	4.6865		2339.38	2182.77
KST	24.831	121.963	48.2	33.7	20.51	0.205	5.7425		2144.98	2193.22
KST	24.834	121.969	14.3	33.72	20.84	0.216	3.77		2147.58	2187.86
KST	24.833	121.959	38.8	33.76	20.09	0.302	6.371		2212.49	2266.2
KST	24.831	121.959	47	32.19	19.62	0.222	6.642		2167.01	2209.71
KST	24.836	121.955	13.2	33.91	21.07	0.215	6.218		2223.04	2184.16
KST	24.834	121.954	24.4	32.01	21.38	0.144	3.6335		2233.11	2195.68
KST	24.832	121.954	35	33.29	19.34	0.188	1.4405		2146.19	2201.28
KST	24.836	121.945	11	32.81	23.7	0.148	1.5035		2086.16	2198.17
KST	24.834	121.943	32	33.01	19.55	0.202	2.983		2128.74	2200.94
KST	24.833	121.941	48	32.98	20.81	0.184	2.903		2124.3	2205.11
KST	24.839	121.941	10	32.77	23.02	0.191	2.961		2067.95	2238.66
KST	24.842	121.938	5	32.85	23.82	0.169	2.525		2063.89	2177.46
KST	24.847	121.934	10	32.6	23.67	0.151	1.014		2049.41	2195.8
KST_extra	24.847	121.939	11	30.8	22.9	0.179	5.5		2099.1	2195.5
KST_extra	24.859	121.956	20	31.14	23.45	0.111	2.99		2100	2197.3
KST_extra	24.85	121.961	10	32.33	22.56	0.163	2.56		2096.4	2122.7
KST_extra	24.842	121.961	15	33.45	22.34	0.119	1.76		2205.4	2061.5
KST_extra	24.844	121.963	10	33.22	22.1	0.181	2.65		2160.5	2055.7
KST_extra	24.849	121.966	11	33.21	22.05	0.223	2.33		2174.1	2044.9
KST_extra	24.841	121.974	20	32.32	22.67	0.131	5.55		2034	2035.6
KST_extra	24.837	121.964	11	32.1	22.45	0.133	5.86		2053.1	2101
KST_extra	24.835	121.967	10	32.11	23.7	0.178	1.66		2105.4	2144.6
KST_extra	24.834	121.971	20	31.99	23.9	0.133	2.44		2099.7	2191.4
KST_extra	24.829	121.963	11	33.56	24.4	0.09	2.65		2162.1	2177.3
KST_extra	24.828	121.963	20	33.44	24.1	0.1	0.33		2174.6	2166.5
KST_extra	24.836	121.959	20	33.01	22.5	0.2	6.5		2107	2177.4
KST_extra	24.829	121.958	10	32.12	22.9	0.3	5.5		2029.4	2169.1
KST_extra	24.843	121.928	30	34.7	17.67	0.356	3.65		2143	2302.65
OFFSHORE	24.859	121.923	1	34.42	23.43	0.041	0.7525		2083.82	2273.47		53.8868	563.192	0.836527	10.4539	10.4695	85.9045	421.543	4.38199	0.0884258	482.766		22.6346	1.25402	0.131774	0.729466	1.97109	2.1219	0.0497863	0.0489285	2.0029	14.1963	0.782847	0.0301938	0.00484653	0.0161091	0.320405	0.0352695	0.125727	0.0208083
OFFSHORE	24.853	121.961	1	34.52	25.11	0.051	3.9315		2081.63	2307.67		52.0698	537.543	0.804016	10.1061	10.0221	84.179	407.136	1.79886	0.115287	460.624		21.7765	1.22113	0.118466	0.418109	1.83968	2.0316	0.0488688	0.0440356	1.07625	13.4442	0.741818	0.0292397	0.00296177	0.0106666	0.0772853	0.0128467	0.0424748	0.0203412
OFFSHORE	24.827	121.955	1	34.8	24	0.044	0.7315		2122.94	2292.37		52.4244	542.431	0.820271	10.1313	10.0881	83.5627	411.166	5.87006	0.0578742	463.344		21.8218	1.2149	0.111859	0.311357	1.7247	2.03913	0.0414194	0.0440356	0.46332	13.8182	0.279159	0.0300877	0.00307716	0.00993848	0.0223118	0.00929304	0.0268431	0.019527
OFFSHORE	24.837	121.922	1	34.6	23.1	0.075	5.3135		2059.88	2298.97		57.4762	599.517	0.892795	11.2028	11.1691	91.0809	444.414	5.36881	0.0817194	512.924		23.7403	1.32567	0.123218	0.640507	2.19284	2.25734	0.0562526	0.0538213	9.06853	14.7677	1.17001	0.0361654	0.0154243	0.0413739	2.06778	0.0377382	0.181998	0.020795
OFFSHORE	24.859	121.923	90.7	34.56	19.01	0.271	2.3625		2182.87	2322.91
OFFSHORE	24.853	121.961	115.6	34.55	17.03	0.281	5.5415		2197.29	2314.66
OFFSHORE	24.827	121.955	80.4	34.8	18.5	0.274	2.3415		2135.69	2313.44
OFFSHORE	24.837	121.922	65.4	35	19.2	0.305	6.9235		2182.32	2312.09
SUMMER 2016 (August)
METADA									SEAWATER CARBON CHEMISTRY			MAJORS											MINORS
Sample	LAT	LONG	Depth	Sal	Temp	P	Nitrate		DIC	TA		Mg	Cl	Br	Ca	K	Sr	B	Si	P	Na		Li	Rb	Mo	Cd	Sb	Cs	Ba	Tl	Pb	U	Al	V	Cr	Mn	Fe	Cu	Zn	As
						μmol/L	μmol/L		μmol/kg	μmol/kg		mM	mM	mM	mM	mM	µM	µM	µM	µM	mM		µM	µM	µM	nM	nM	nM	µM	nM	nM	nM	µM	µM	µM	µM	µM	µM	µM	µM
KST	24.847	121.945	1	33.8318	29.58	0.015	0.131		2098.34	2206.04		50.886	525.388	0.804005	9.85209	9.68413	81.2956	401.725	1.23888	0.0166774	452.402		24.949	1.24695	0.112839	0.925176	2.01216	2.07675	0.0364823	0.0440356	1.92085	13.1754	0.809755	0.0304234	0.00484653	0.0138702	0.119366	0.0506007	0.0854084	0.0193268
KST	24.852	121.953	1	33.6853	29.42	0.031	0.53		2092.64	2173.54		50.8049	528.864	0.804005	9.9291	9.76969	82.5481	399.834	0.825917	0.0136871	455.49		25.1135	1.2372	0.11263	0.160127	1.83147	2.03913	0.0358123	0.0440356	1.41409	12.7762	0.817835	0.0312185	0.00290407	0.021588	0.111039	0.0323134	0.0476445	0.017952
KST	24.845	121.961	1	33.3699	29.18	0.044	0.809		2205.15	2399.08		51.8591	539.932	0.818848	10.1088	9.9823	83.2313	409.289	2.10395	0.0126323	463.361		27.0754	1.33667	0.120967	0.231294	2.32424	2.76147	0.0416378	0.063607	5.29923	13.3686	1.60884	0.0352467	0.00959689	0.068368	0.63798	0.0631172	0.12903	0.0249593
KST	24.84	121.966	1	33.5614	29.99	0.061	0.484		2242.16	2186.47		51.2915	528.002	0.796584	9.93167	9.74895	82.5481	403.521	5.94874	0.00684516	454.272		25.146	1.25639	0.112755	0.302462	1.9793	2.02558	0.0370575	0.0424283	2.87645	12.8309	1.11827	0.049098	0.0138088	0.355619	2.17509	0.0331939	0.0820893	0.0662956
KST	24.84	121.968	1	33.6065	29.88	0.072	0.428		2119.46	2053.93		51.332	537.067	0.808953	10.0703	9.95378	82.4342	407.776	1.22464	0.00702903	462.84		26.5641	1.29602	0.118247	0.186814	1.86432	2.79157	0.0369046	0.063607	1.56853	13.6039	1.85056	0.0374551	0.0129048	0.107157	0.725687	0.0442638	0.0422912	0.0353701
KST	24.84	121.971	1	33.7867	29.96	0.079	0.05		2111.48	2130.31		51.6564	532.785	0.804005	9.98814	9.80858	82.7758	405.696	0.936276	0.0132581	458.926		24.6284	1.23439	0.110942	0.160127	1.7247	2.46802	0.0364968	0.0489285	1.05695	12.9233	1.07001	0.0313068	0.0053658	0.0697514	0.277464	0.021385	0.0434078	0.0265343
KST	24.837	121.964	1	33.629	29.52	0.021	0.623		2138.58	2074.66		51.4537	537.679	0.811427	10.0703	9.90192	83.5728	408.721	1.97188	0.0108161	463.579		26.1653	1.31634	0.117372	0.151231	2.07786	3.09556	0.0660322	0.0712496	2.78475	13.7299	2.04959	0.057278	0.0259466	0.127132	2.58098	0.0458362	0.0918935	0.0214597
KST	24.835	121.966	1	33.7529	28.01	0.055	0.432		2066.99	2121.53		52.5484	536.233	0.834929	10.3296	9.8734	86.3055	430.089	1.02528	0.0236452	475.494
KST	24.834	121.969	1	33.6741	29.04	0.081	0.27		2064.84	2242.71		50.886	529.726	0.796584	9.84182	9.70487	83.3451	400.496	1.17124	0.0114419	454.794		24.6439	1.24759	0.112474	0.338045	1.93003	2.0918	0.0361619	0.0489285	7.18629	13.0577	0.910974	0.0326849	0.00719286	0.0171284	0.202919	0.0557268	0.206011	0.0189664
KST	24.835	121.962	1	33.7755	29.98	0.044	0.05		2438.49	2032.75		50.6022	522.357	0.790399	9.80845	9.66338	80.7263	397.849	4.2435	0.0106419	448.88		24.7367	1.23953	0.116694	0.160127	1.83968	2.7991	0.0421476	0.0440356	1.33205	13.0577	0.352693	0.0372608	0.00642357	0.265718	0.837622	0.00979621	0.043576	0.0331011
KST	24.833	121.963	1	33.6065	28.41	0.087	0.498		2031.01	2182.22		50.4806	522.218	0.789162	9.81102	9.64783	81.2956	396.619	2.12531	0.0100903	451.272		24.4078	1.24219	0.112641	0.231294	1.74113	2.01655	0.0390965	0.0489285	6.36583	12.4737	0.242912	0.0304058	0.00338488	0.00942881	0.032626	0.0360086	0.167131	0.0183925
KST	24.831	121.963	1	33.7191	29.99	0.087	0.823		2198.09	2186.29		50.5616	520.688	0.789162	9.76225	9.60894	81.5234	398.699	1.87255	0.00566129	448.576		24.1607	1.22237	0.109962	0.231294	1.76577	1.96388	0.0378513	0.0489285	3.1805	12.7258	0.467106	0.0315188	0.00744288	0.0119953	0.309965	0.0207717	0.056011	0.0185793
KST	24.834	121.969	1	33.3248	27.7	0.061	0.47		2290.16	2180.52		49.8318	521.467	0.784214	9.69294	9.64783	81.1818	395.012	1.21396	0.0110548	448.141		24.8418	1.24267	0.117549	0.738362	1.74934	2.50564	0.0368318	0.0538213	5.68533	12.8309	0.180979	0.0358474	0.0153089	0.0269031	0.588916	0.0330681	0.203839	0.0202744
KST	24.833	121.959	1	33.3699	28.39	0.055	0.391		2027.32	2179.96		50.0751	517.101	0.787925	9.72118	9.55967	80.4986	394.256	1.92951	0.0109677	446.14		24.6718	1.24091	0.11139	0.204606	2.33246	1.99398	0.0347346	0.0489285	2.36486	12.9065	0.165264	0.0308475	0.00401954	0.010521	0.326475	0.0204258	0.0663659	0.0185526
KST	24.831	121.959	1	33.1896	28.6	0.01	0.363		2125.45	2174.57		50.0345	515.822	0.775556	9.77252	9.57004	80.2709	398.132	1.11143	0.00912581	445.836		28.4124	1.33412	0.110202	0.231294	1.86432	2.71482	0.0501941	0.0587142	1.87741	12.7846	0.877395	0.0181622	0.00275021	0.314143	0.206088	0.0176898	0.0574029	0.0133739
KST	24.836	121.955	1	33.2122	28.99	0.02	0.813		2252.79	2119.59		50.7238	529.837	0.808953	9.8906	9.78784	82.3204	401.725	1.00036	0.00958387	455.316		26.3886	1.33653	0.136807	0.302462	2.20105	2.28743	0.0512062	0.0587142	3.96718	13.8728	1.89404	0.0349286	0.0227341	0.0194037	0.716483	0.0381785	0.0990211	0.0200609
KST	24.834	121.954	1	33.2572	29.1	0.081	0.674		2082.91	2206.69		49.5074	513.68	0.774319	9.74685	9.50263	79.7016	390.852	2.29263	0.00920968	443.618		24.414	1.24638	0.119112	0.373629	2.01216	2.03913	0.0495533	0.0489285	5.35714	12.814	1.77703	0.0326495	0.0255604	0.0183116	0.445537	0.0369363	0.100535	0.0195804
KST	24.832	121.954	1	33.2234	29.03	0.093	1.152		2107.49	2186.07		49.8724	516.016	0.784214	9.68781	9.53115	79.4739	392.176	0.900676	0.0105968	443.966		24.3285	1.22847	0.111005	0.204606	1.7247	2.15952	0.0393368	0.0440356	1.24035	13.0283	0.296616	0.0307591	0.00423109	0.0357312	0.133888	0.0152368	0.038758	0.0186861
KST	24.836	121.945	1	33.1446	28.61	0.105	0.683		2072.58	2192.26		49.6291	513.903	0.775556	9.6801	9.52337	80.157	391.419	1.95443	0.00629355	442.835		24.2463	1.25237	0.120654	0.231294	1.94645	2.03913	0.0423223	0.0489285	1.73263	12.8813	0.358215	0.0308828	0.00330795	0.0106848	0.123449	0.0244198	0.0782655	0.0178452
KST	24.834	121.943	1	33.1671	29.02	0.056	0.813		2027.02	2195.91		49.4669	511.678	0.770608	9.6031	9.43781	80.157	389.529	2.28551	0.00777419	441.313		24.2924	1.23843	0.115506	0.320253	1.83968	2.03913	0.0460302	0.063607	7.17181	13.0871	0.864127	0.0316425	0.00976998	0.0169282	0.246844	0.0583685	0.310202	0.0184192
KST	24.833	121.941	1	33.0544	28.83	0.075	0.683		2036.18	2244.87		50.2373	518.018	0.784214	9.70064	9.54412	80.3848	395.958	1.88679	0.0031871	445.531		24.0896	1.24383	0.109712	0.213502	1.7247	2.57336	0.0442302	0.0538213	1.36583	13.2846	0.285905	0.0309711	0.00225017	0.0331283	0.104844	0.0147336	0.0427195	0.018873
KST	24.839	121.941	1	33.0544	28.22	0.02	0.05		2044.75	2198.15		49.2236	510.705	0.775556	9.63647	9.49226	79.36	389.15	3.49947	0.00426129	441.183		25.0016	1.2946	0.115569	0.222398	1.83147	2.50564	0.0444996	0.0489285	4.00097	13.3056	0.650865	0.0316425	0.00455804	0.10419	0.272361	0.0280835	0.0795962	0.0188997
KST	24.842	121.938	1	33.077	28.83	0.062	0.632		2061.49	2287.98		49.994	516.239	0.775556	9.6801	9.50522	80.2709	392.27	0.882876	0.00861613	444.444		24.0104	1.22307	0.113026	0.489276	1.71649	2.04665	0.0409679	0.0538213	2.63996	13.1081	0.545717	0.0371361	0.0173475	0.0314536	0.657033	0.0297975	0.0630315	0.020875
KST	24.847	121.934	1	33.1333	28.86	0.081	0.05		2055.8	2373.49													26.1346	1.35931	0.121644	0.249086	2.25854	2.21971	0.0473541	0.0489285	5.80116	14.5072	0.677328	0.0327909	0.00255789	0.0105027	0.0640523	0.0755865	0.135026	0.0207549
KST_extra	24.847	121.939	1	33.58	28.85	0.241	5.17		2032.7	2190.76
KST_extra	24.859	121.956	1	32.87	29.15	0.253	2.72		2041.86	2187.86
KST_extra	24.85	121.961	1	32.08	28.4	0.225	1.5		2091.6	2119.7
KST_extra	24.842	121.961	1	33.08	27.72	0.28	1.14		2032.8	2151.7
KST_extra	24.844	121.963	1	33.11	27.65	0.24	2.42		2035.52	2157.97
KST_extra	24.849	121.966	1	33.29	27.48	0.24	2.11		2028.46	2166.06
KST_extra	24.841	121.974	1	32.56	27.75	0.153	5.76		2089.46	2150.17
KST_extra	24.837	121.964	1	32.515	27.61	0.16	5.61		2027.4	2205.85
KST_extra	24.835	121.967	1	32.34	28.42	0.202	1.42		2093.2	2172.9
KST_extra	24.834	121.971	1	32.3	28.35	0.174	2.2		2038.2	2206.05
KST_extra	24.829	121.963	1	33.65	29.35	0.114	1.96		2009.57	2194.05
KST_extra	24.828	121.963	1	33.44	29.07	0.087	0.22		2213.77	2197.85
KST_extra	24.836	121.959	1	32.89	29.06	0.121	5.21		2045.3	2188.85
KST_extra	24.829	121.958	1	32.32	28.63	0.185	6.41		2088.1	2180
KST_extra	24.843	121.928	1	33.39	28.97	0.1	2.99		2093.13	2298.85
KST	24.847	121.945	10	33.6628	29.59	0.015	0.131		2142.02	2246.09
KST	24.852	121.953	20	33.3586	29.3	0.031	0.53		2197.4	2229.42
KST	24.845	121.961	10.4	33.7191	29.39	0.044	0.809		2169.26	2302.51
KST	24.84	121.966	16.6	33.5839	29.4	0.061	0.484		2387.1	2188.03
KST	24.84	121.968	24.4	33.6628	29.78	0.072	0.428		2124.19	2153
KST	24.84	121.971	35.7	33.7417	29.58	0.079	0.05		2120.42	2174.97
KST	24.837	121.964	8.7	33.6628	29.78	0.021	0.623		2680.58	2092.08
KST	24.835	121.966	17.9	33.7417	28.24	0.055	0.432		2382.8	2039.59
KST	24.834	121.969	30.2	33.5051	26.62	0.081	0.27		2113.73	2190.91
KST	24.835	121.962	11	33.7755	29.19	0.044	0.05		2393.31	2090.89
KST	24.833	121.963	29.9	33.6741	26.38	0.087	0.498		2141.55	2187.24
KST	24.831	121.963	48.2	33.415	25.01	0.087	0.823		2132.39	2194.85
KST	24.834	121.969	14.3	33.415	26.98	0.061	0.47		2098.88	2189.31
KST	24.833	121.959	38.8	33.2572	26.01	0.055	0.391		2120.56	2267.28
KST	24.831	121.959	47	33.1671	26.31	0.01	0.363		2094.85	2209.82
KST	24.836	121.955	13.2	33.2234	29.88	0.02	0.813		2167.27	2185.71
KST	24.834	121.954	24.4	33.7755	26.35	0.081	0.674		2142.85	2195.57
KST	24.832	121.954	35	33.1333	25.62	0.093	1.152		2112.59	2202.47
KST	24.836	121.945	11	33.0995	29.55	0.105	0.683		2072.71	2199.11
KST	24.834	121.943	32	32.8855	24.21	0.056	0.813		2101.39	2201.95
KST	24.833	121.941	48	32.9643	24.48	0.075	0.683		2129.65	2344.54
KST	24.839	121.941	10	33.0206	26.91	0.02	0.05		2067.95	2238.66
KST	24.842	121.938	5	33.1446	28.16	0.062	0.632		2085	2058.36
KST	24.847	121.934	10	33.0544	26.01	0.081	0.05		2051.7	2217.15
KST_extra	24.847	121.939	11	32.93	27.6	0.049	1.56		2091.5	2208.6
KST_extra	24.859	121.956	20	33.27	28.15	0.081	1.99		2092.4	2210.4
KST_extra	24.85	121.961	10	32.46	27.26	0.033	1.56		2059.8	2135.8
KST_extra	24.842	121.961	15	33.58	27.44	0.11	0.76		2068.8	2174.6
KST_extra	24.844	121.963	10	33.35	27.2	0.051	1.65		2023.9	2168.8
KST_extra	24.849	121.966	11	33.43	27.15	0.093	1.33		2037.5	2158
KST_extra	24.841	121.974	20	32.54	27.77	0.001	1.55		2096.3	2150.8
KST_extra	24.837	121.964	11	32.32	27.55	0.003	1.86		2015	2186.2
KST_extra	24.835	121.967	10	32.33	28.8	0.048	0.66		2096.3	2159.8
KST_extra	24.834	121.971	20	33.21	29	0.003	1.44		2090.6	2200.4
KST_extra	24.829	121.963	11	33.78	29.5	0.11	1.65		2024	2192.5
KST_extra	24.828	121.963	20	33.66	29.2	0.095	0.45		2036.5	2181.7
KST_extra	24.836	121.959	20	33.23	27.6	0.07	0.99		2069.2	2192.6
KST_extra	24.829	121.958	10	32.34	28	0.17	1.23		2091.3	2184.3
KST_extra	24.843	121.928	30	33.92	27.77	0.13	0.87		2034.57	2213.15
OFFSHORE	24.859	121.923	1	33.72	28.41	0.068	0.6525		2083.82	2273.47		52.5484	545.466	0.822559	10.2577	10.0497	84.9391	412.692	0.907796	0.0153806	470.102		27.8578	1.4484	0.129377	0.293566	2.08607	2.64861	0.0420602	0.0538213	1.21139	15.4987	0.225418	0.035653	0.00378875	0.0459609	0.126529	0.0198597	0.0573111	0.026294
OFFSHORE	24.853	121.961	1	33.73	30.1	0.078	2.2315		2041.63	2207.67		53.3594	555.922	0.829981	10.4245	10.2753	87.3302	421.485	2.28409	0.0111065	479.321		26.9647	1.38707	0.12821	0.818425	2.07786	2.27239	0.0496479	0.0489285	1.63127	15.066	0.854194	0.0348933	0.00394261	0.00755397	0.0994001	0.0166048	0.069119	0.0219829
OFFSHORE	24.827	121.955	1	33.75	27.73	0.071	0.5315		2022.94	2292.37		53.7243	555.254	0.827507	10.327	10.2157	86.3055	420.634	0.711997	0.010371	479.539		24.6984	1.21221	0.120786	0.578235	1.54796	3.01731	0.0523164	0.0550712	2.8639	15.9816	1.34472	0.0423667	0.00867374	0.0192035	0.152279	0.015479	0.288483	0.0267879
OFFSHORE	24.837	121.922	1	33.71	28.74	0.102	2.3135		2059.88	2298.97		52.6701	544.27	0.822559	10.2089	10.0523	84.256	414.772	2.87291	0.0116935	468.536		23.499	1.23231	0.11263	0.302462	1.78219	2.01655	0.0406912	0.0440356	2.10425	13.6963	0.445943	0.0305648	0.00175013	0.00504205	0.0334497	0.0326593	0.0334659	0.0194869
OFFSHORE	24.859	121.923	90.7	34.19	15.3	0.301	0.9625		2097.17	2245.91
OFFSHORE	24.853	121.961	115.6	34.21	15.48	0.311	2.2415		2111.59	2237.66
OFFSHORE	24.827	121.955	100	34.19	19.21	0.304	2.0415		2049.99	2236.44
OFFSHORE	24.837	121.922	50	34.23	21.02	0.335	3.8235		2096.62	2235.09
SUMMER 2017 (August)
METADA									SEAWATER CARBON CHEMISTRY			MAJORS											MINORS
Sample	LAT	LONG	Depth	Sal	Temp	P	Nitrate		DIC	TA		Mg	Cl	Br	Ca	K	Sr	B	Si	P	Na		Li	Rb	Mo	Cd	Sb	Cs	Ba	Tl	Pb	U	Al	V	Cr	Mn	Fe	Cu	Zn	As
						μmol/L	μmol/L		μmol/kg	μmol/kg		mM	mM	mM	mM	mM	µM	µM	µM	µM	mM		µM	µM	µM	nM	nM	nM	µM	nM	nM	nM	µM	µM	µM	µM	µM	µM	µM	µM
KST	24.847	121.945	1	33.65	28.49	0.075	0.291		2040.42	2045.85		49.0365	506.269	0.759605	9.47386	9.37148	78.5371	373.159	6.10751	0.03	432.879		28.5327	1.09489	0.111346	0.245083	2.33697	1.61851	0.0398738	0.010275	0.27751	12.7351	1.50365	0.0185705	0.0026454	0.38161	0.369197	0.00292314	0.0236051	0.0184712
KST	24.852	121.953	1	33.7	28.7	0.091	0.69		2092.89	1997.6		48.547	504.594	0.753389	9.52573	9.33982	78.8841	370.962	6.2371	0.03	433.93		27.5953	1.07811	0.108458	0.219729	1.98341	2.24831	0.0401185	0	0.105454	12.9939	0.73952	0.0217448	0.00252423	0.322684	0.237507	0.00112428	0.0158489	0.0275106
KST	24.845	121.961	1	33.5	28.69	0.104	0.969		2443.35	1631.72		48.9549	507.065	0.753389	9.5776	9.36884	79.4624	372.426	4.5283	0.03	436.031		24.7516	1.03431	0.111569	0.245083	2.15588	3.19187	0.0350951	0.0154125	0.133205	12.4964	0.252659	0.0275966	0.00137318	0.236507	0.038375	0.00121077	0.00834506	0.0619725
KST	24.84	121.966	1	33.5	27.87	0.121	0.644		2019.25	2104.07		47.935	495.999	0.744687	9.39346	9.18415	77.9588	364.553	5.1335	0.03	427.49		24.6119	1.00522	0.107915	0.185925	1.88855	2.60722	0.0342005	0.00513749	0.29971	13.088	0.446944	0.0256532	0.00147415	0.111786	0.024217	0.00205831	0.156684	0.0236146
KST	24.84	121.968	1	33.3	28.08	0.132	0.588		2537.02	1637.53		48.0574	499.843	0.753389	9.50239	9.28705	77.8431	366.201	0.01	0.03	431.555		25.7633	1.02782	0.112645	0.253534	1.96616	2.81264	0.0347433	0	0.133205	12.4863	0.143805	0.0278126	0.00113086	0.213681	0.0249879	0.00122806	0.0185913	0.0630796
KST	24.84	121.971	1	33.85	28.61	0.139	0.21		2838.84	1437.89		47.9758	504.456	0.758362	9.55685	9.33718	78.5371	367.757	0.01	0.03	432.103		25.4535	1.01828	0.107547	0.261985	1.92305	2.72573	0.0349421	0.00513749	0.138755	13.0006	0.188503	0.0274671	0.00169628	0.1415	0.0288235	0.00143562	0.019584	0.0484484
KST	24.837	121.964	1	33.86	28.58	0.081	0.783		2764.43	1370.6		49.5261	511.898	0.759605	9.68134	9.52186	79.8094	373.891	0.01	0.03	442.06		24.5124	1.0216	0.108206	0.253534	1.87993	2.94695	0.0337876	0.00513749	0.116554	12.9737	0.192283	0.0283092	0.00187803	0.26618	0.0352162	0.00131455	0.0232181	0.0647894
KST	24.835	121.966	1	33.6	28.33	0.115	0.592		2512.26	1599.6		49.934	517.06	0.773281	9.77211	9.56935	80.6191	376.272	0.01	0.03	443.248		25.8489	1.05327	0.112974	0.261985	2.24212	2.75734	0.0353168	0.00513749	0.133205	12.9804	0.375635	0.028266	0.00181745	0.102015	0.0645098	0.00141833	0.0131401	0.0677745
KST	24.834	121.969	1	33.44	28.18	0.121	0.38		2277.7	1635.29		49.8932	514.397	0.765821	9.70468	9.57727	80.3878	377.919	0.01	0.03	443.248		25.4593	1.02767	0.111462	0.245083	1.84543	2.39391	0.0341087	0.0154125	0.188707	13.1048	0.252215	0.0283092	0.00173667	0.0601278	0.0279962	0.00171237	0.00635974	0.0443701
KST	24.835	121.962	1	33.67	28.02	0.084	0.16		2416.75	1708.98		49.3221	511.623	0.763335	9.66837	9.48493	79.3468	374.532	0.01	0.03	439.868		25.138	1.03205	0.109699	0.261985	1.95754	2.80474	0.0351486	0.005	0.0499517	13.777	0.169786	0.0273807	0.0019588	0.220749	0.0226001	0.00100321	0.0399587	0.0680267
KST	24.833	121.963	1	33.78	28.39	0.127	0.608		2488.08	1633.81		49.5261	512.255	0.773281	9.67615	9.50603	79.9251	375.448	0.01	0.03	440.188		23.7185	1.01254	0.106045	0.253534	1.82819	2.67833	0.0338564	0.00513749	0.160956	12.4561	0.304325	0.0274455	0.00240307	0.104538	0.0455197	0.00181615	0.0100107	0.0588052
KST	24.831	121.963	1	33.89	27.79	0.127	0.933		1983.6	2168.93		49.1589	507.916	0.760849	9.61131	9.47701	79.8094	372.976	0.01	0.03	437.767		25.3301	1.01181	0.111898	0.29579	1.84543	1.90406	0.0344375	0	0.127654	13.7165	0.106186	0.027575	0.00147415	0.0123139	0.005	0.00160859	0.00935454	0.0175603
KST	24.834	121.969	1	33.34	28.56	0.101	0.58		2939.02	1517.49		48.6694	504.896	0.754632	9.54907	9.36092	78.6528	367.849	0.01	0.03	434.295		25.5915	1.04323	0.11435	0.194376	1.8713	2.86005	0.0368307	0.026	0.0499517	12.6846	0.368037	0.0280285	0.00169628	0.131628	0.0561241	0.000622681	0.0159162	0.0598703
KST	24.834	121.969	1	33.29	27.67	0.095	0.501		1954.05	2189.51		48.7917	506.983	0.760849	9.58019	9.40841	78.9998	369.497	0.01	0.03	436.579		24.7447	1.02227	0.113779	0.245083	1.74195	1.79345	0.0338641	0.01	0.382963	13.2964	0.0896557	0.0282013	0.00123183	0.0103316	0.00312114	0.0015913	0.0309575	0.0185133
KST	24.833	121.959	1	33.55	27.3	0.05	0.473		1954.24	2200.5		47.6495	496.301	0.740957	9.37272	9.21581	76.9178	361.99	0.01	0.03	426.941		24.1992	0.997555	0.106588	0.270436	1.89717	1.76975	0.0406919	0.005	0.516168	13.3098	0.0889144	0.0283092	0.000949111	0.00812916	0.003	0.00193723	0.0197522	0.0160607
KST	24.831	121.959	1	33.57	27.66	0.06	0.923		1930.06	2213.51		48.8733	501.985	0.74966	9.50757	9.33982	78.6528	367.666	0.01	0.03	432.057		25.2291	1.01374	0.113585	0.287338	1.6126	1.87246	0.0342234	0	0.111004	13.6661	0.0995886	0.0271864	0.00151454	0.00866977	0.008	0.00147022	0.0100107	0.0196765
KST	24.836	121.955	1	33.67	27.73	0.121	0.784		1923.64	2220.1		47.7311	494.626	0.747173	9.33381	9.18679	77.2648	361.715	0.01	0.03	425.571		25.0813	1.04471	0.11625	0.29579	1.83681	1.88036	0.0358367	0	0.56612	13.2224	0.0672696	0.0271	0.00143376	0.00658743	0.008	0.00202371	0.0301331	0.0178686
KST	24.834	121.954	1	33.23	28.03	0.133	1.262		1923.64	2219.06		47.5679	496.878	0.740957	9.36493	9.19471	77.7275	362.539	0.01	0.03	426.759		24.8949	1.04713	0.117277	0.312692	1.67296	1.84086	0.0340629	0	0.122104	13.8375	0.0559282	0.0284388	0.00139338	0.00568641	0.01	0.0015913	0.00886663	0.0181909
KST	24.832	121.954	1	33.44	27.87	0.145	0.793		1926.6	2220		48.3022	500.42	0.74593	9.4194	9.25011	77.3805	363.454	0.01	0.03	428.586		25.2677	1.02876	0.114157	0.219729	1.83681	1.83296	0.0347892	0.005	0.155405	13.33	0.0680479	0.0277478	0.00143376	0.00680767	0.01	0.00377068	0.0207449	0.0198587
KST	24.836	121.945	1	33.57	28.01	0.096	0.923		1927.69	2201.78		47.7718	496.96	0.748416	9.3779	9.21054	77.3805	362.173	0.01	0.03	427.535		23.2708	0.996174	0.112974	0.287338	1.81956	2.05418	0.0338488	0	0.188707	12.7956	0.286869	0.028482	0.00105008	0.0162183	0.0155117	0.00122806	0.049532	0.0175883
KST	24.834	121.943	1	33.78	27.78	0.115	0.793		1915.63	2208.38		47.6087	492.457	0.740957	9.27935	9.11292	76.4551	359.792	0.01	0.03	424.338		25.7545	1.04094	0.110454	0.354947	1.7592	2.17269	0.0356685	0.00513749	0.222008	13.5384	0.152441	0.0283956	0.0013126	0.0132549	0.0155869	0.00162589	0.0126354	0.0164671
KST	24.833	121.941	1	33.79	28.23	0.02	0.16		1980.26	2179.95		48.0166	497.921	0.740957	9.36493	9.22109	77.1491	362.447	< 0.01	0.03	425.891		23.9227	1.04285	0.114641	0.278887	1.93167	1.95937	0.0344069	0	0.0888031	13.1754	0.0997739	0.027575	0.00179725	0.0193018	0.001	0.000743757	0.0308061	0.0196624
KST_extra	24.847	121.939	1	33.25	28.64	0.181	5.17		2024.8	2202.06
KST_extra	24.859	121.956	1	32.54	28.94	0.093	2.72		2033.96	2199.16
KST_extra	24.85	121.961	1	31.75	28.19	0.165	1.5		2083.7	2131
KST_extra	24.842	121.961	1	32.75	27.51	0.22	1.14		2024.9	2163
KST_extra	24.844	121.963	1	32.78	27.44	0.2	2.42		2027.62	2163.37
KST_extra	24.849	121.966	1	32.96	27.27	0.2	2.11		2020.56	2171.46
KST_extra	24.841	121.974	1	32.69	27.88	0.113	5.76		2092.76	2155.57
KST_extra	24.837	121.964	1	32.645	27.74	0.12	5.61		2030.7	2211.25
KST_extra	24.835	121.967	1	32.47	28.55	0.162	1.42		2096.5	2178.3
KST_extra	24.834	121.971	1	32.43	28.48	0.084	2.2		2041.5	2211.45
KST_extra	24.829	121.963	1	33.78	29.04	0.024	1.96		2012.87	2197.95
KST_extra	24.828	121.963	1	33.57	28.76	0.197	0.22		2217.07	2201.75
KST_extra	24.836	121.959	1	33.02	28.75	0.031	5.21		2048.6	2192.75
KST_extra	24.829	121.958	1	32.45	28.32	0.095	6.41		2091.4	2183.9
KST_extra	24.843	121.928	1	33.52	28.66	0.01	2.99		2096.43	2302.75
KST	24.847	121.945	10	33.44	28.72	0.045	0.961		2106.12	2066.85
KST	24.852	121.953	20	33.49	28.93	0.061	1.36		2158.59	2018.6
KST	24.845	121.961	10.4	33.29	28.92	0.074	1.639		2509.05	1652.72
KST	24.84	121.966	16.6	33.29	28.1	0.091	1.314		2084.95	2125.07
KST	24.84	121.968	24.4	33.09	28.53	0.102	1.258		2602.72	1658.53
KST	24.84	121.971	35.7	33.64	29.06	0.109	0.88		2904.54	1458.89
KST	24.837	121.964	8.7	33.75	29.03	0.051	1.453		2830.13	1413.6
KST	24.835	121.966	17.9	33.49	28.78	0.085	1.262		2577.96	1642.6
KST	24.834	121.969	30.2	33.33	28.63	0.091	1.05		2343.4	1678.29
KST	24.835	121.962	11	33.56	28.47	0.054	0.83		2482.45	1751.98
KST	24.833	121.963	29.9	33.67	28.84	0.097	1.278		2553.78	1676.81
KST	24.831	121.963	48.2	33.78	28.24	0.097	1.603		2049.3	2211.93
KST	24.834	121.969	14.3	33.23	29.2	0.071	1.25		2970.32	1560.49
KST	24.833	121.959	38.8	33.18	28.31	0.065	0.631		2009.05	2232.51
KST	24.831	121.959	47	33.44	27.94	0.02	0.603		2009.24	2243.5
KST	24.836	121.955	13.2	33.46	28.3	0.03	1.053		1985.06	2256.51
KST	24.834	121.954	24.4	33.56	28.37	0.091	0.914		1978.64	2263.1
KST	24.832	121.954	35	33.12	28.67	0.103	1.392		1978.64	2262.06
KST	24.836	121.945	11	33.33	28.51	0.115	0.923		1981.6	2233
KST	24.834	121.943	32	33.46	28.65	0.066	1.053		1982.69	2214.78
KST	24.833	121.941	48	33.87	28.1	0.085	0.923		1970.63	2221.38
KST	24.839	121.941	10	33.88	28.55	0.033	0.29		2035.26	2192.95
KST	24.842	121.938	5	33.34	28.96	0.151	5.3		2079.8	2215.06
KST	24.847	121.934	10	32.63	29.26	0.063	2.38		2076.96	2212.16
KST_extra	24.847	121.939	11	31.84	28.51	0.135	1.16		2126.7	2144
KST_extra	24.859	121.956	20	32.84	27.83	0.19	0.8		2067.9	2176
KST_extra	24.85	121.961	10	32.87	27.76	0.17	2.08		2070.62	2172.37
KST_extra	24.842	121.961	15	33.05	27.59	0.17	1.77		2063.56	2180.46
KST_extra	24.844	121.963	10	32.78	28.29	0.083	5.42		2135.76	2164.57
KST_extra	24.849	121.966	11	32.735	28.15	0.09	5.27		2073.7	2220.25
KST_extra	24.841	121.974	20	32.56	28.96	0.132	1.08		2125.5	2187.3
KST_extra	24.837	121.964	11	32.66	28.89	0.054	1.86		2070.5	2220.45
KST_extra	24.835	121.967	10	34.01	29.45	0.022	1.62		2041.87	2213.95
KST_extra	24.834	121.971	20	33.8	29.17	0.167	1.12		2246.07	2217.75
KST_extra	24.829	121.963	11	33.25	29.16	0.001	4.87		2077.6	2208.75
KST_extra	24.828	121.963	20	32.68	28.73	0.065	6.07		2120.4	2199.9
KST_extra	24.836	121.959	20	33.75	29.07	0.016	2.65		2125.43	2318.75
KST_extra	24.829	121.958	10	33.731	27.98	0.058	1.2		2089.56	2201.5
KST_extra	24.843	121.928	30	33.506	28.32	0.159	2.2		2111.4	2247.8
OFFSHORE	24.859	121.923	1	33.94	27.34	0.098	0.7925		1944.09	2205.09		51.9738	540.868	0.795659	10.1974	9.95456	84.0891	393.208	0.01	0.03	464.351		27.1006	1.0602	0.113449	0.304241	1.6126	1.94357	0.0341317	0.010275	0.0666023	14.1669	0.0666395	0.0284172	0.00125202	0.00660745	0.011	0.000916724	0.00252371	0.0179106
OFFSHORE	24.853	121.961	1	33.95	25.95	0.108	2.3715		1950.44	2211.44		51.933	538.424	0.798145	10.1482	9.89651	83.5107	393.117	0.01	0.03	460.514		25.6477	1.07993	0.111966	0.219729	1.69021	1.86456	0.0331912	0.005	0.0666023	12.6712	0.0506282	0.0290218	0.00133279	0.00572646	0.011	0.0010205	0.00790762	0.0187795
OFFSHORE	24.827	121.955	1	33.95	26.66	0.101	0.6715		1952.07	2213.07		50.4644	522.085	0.767065	9.80063	9.60893	80.5034	377.919	0.01	0.03	446.994		25.5575	1.04426	0.109805	0.287338	1.53499	1.79345	0.0329771	0	0.155405	13.7669	0.0649716	0.0285036	0.00155493	0.00640722	0.01	0.00140103	0.00900122	0.0170978
OFFSHORE	24.859	121.923	1	33.98	26.13	0.082	2.4535		1951.97	2199.97		51.8922	539.385	0.808091	10.1196	9.92026	82.7011	390.828	0.01	0.03	463.118		26.2221	1.04403	0.109369	0.346496	1.54361	1.81716	0.0330612	0	2.33108	13.1619	0.0615618	0.028266	0.00133279	0.00626706	0.011	0.00221398	0.00736923	0.0192841
OFFSHORE	24.853	121.961	1	34.09	25.47	0.048	0.7925		1957.72	2205.72		51.2395	533.673	0.789443	10.0496	9.86749	82.3541	387.166	0.01	0.03	458.55		26.4967	1.08674	0.111879	0.236632	1.60398	1.83296	0.0344069	0.005	1.3154	12.6813	0.0811682	0.0286331	0.00117124	0.0071881	0.003	0.00236965	0.0190624	0.0180508
OFFSHORE	24.827	121.955	1	34.12	24.9	0.058	2.3715		1981.99	2229.99		49.6892	514.397	0.762092	9.66837	9.49548	80.5034	371.511	0.01	0.03	440.873		24.574	1.01831	0.111346	0.29579	1.62985	1.76975	0.0325031	0	0.199807	13.4879	0.0454394	0.0283092	0.00137318	0.00384433	0.011	0.00370149	0.00723463	0.0193401
OFFSHORE	24.859	121.923	90.7	34.44	19.4	0.051	0.6715		2046.98	2301.98		52.341	544.712	0.813064	10.2545	10.0469	85.2457	394.856	0.01	0.03	467.959		27.8192	1.08332	0.118925	0.287338	1.66434	1.88036	0.0353092	0.005	0.0888031	13.3636	0.0356547	0.0291514	0.00141357	0.00388438	0.009	0.000934021	0.0071505	0.0187795
OFFSHORE	24.853	121.961	115.6	34.36	19.6	0.082	2.4535		2040.88	2295.88		51.8106	542.158	0.806848	10.2104	9.98094	84.0891	390.37	0.01	0.03	463.163		25.8186	1.05957	0.113556	0.329594	1.75057	1.81716	0.0361655	0.005	0.560569	12.2813	0.0671954	0.0288491	0.00123183	0.00504569	0.006	0.00392635	0.0273402	0.0177845
OFFSHORE	24.827	121.955	80.4	34.31	21.2	0.281	1.1325		2041.5	2296.5		50.0972	523.706	0.770794	9.86028	9.64059	82.2384	379.934	0.01	0.03	448.044		25.4638	1.01809	0.109098	0.304241	1.5781	1.76975	0.0325107	0.00513749	0.366313	13.5821	0.0183833	0.0293025	0.00125202	0.00448506	0.011	0.00622681	0.0123325	0.0184432
SPRING 2018 (May)
METADA									SEAWATER CARBON CHEMISTRY			MAJORS											MINORS
Sample	LAT	LONG	Depth	Sal	Temp	P	Nitrate		DIC	TA		Mg	Cl	Br	Ca	K	Sr	B	Si	P	Na		Li	Rb	Mo	Cd	Sb	Cs	Ba	Tl	Pb	U	Al	V	Cr	Mn	Fe	Cu	Zn	As
						μmol/L	μmol/L		μmol/kg	μmol/kg		mM	mM	mM	mM	mM	µM	µM	µM	µM	mM		µM	µM	µM	nM	nM	nM	µM	nM	nM	nM	µM	µM	µM	µM	µM	µM	µM	µM
KST	24.839	121.965	1	33.32	24.23				2008.43	2204.86		52.479	547.751	0.825575	10.1491	10.1061	84.0086	399.703	0.2563	35.3548	470.606		27.342	1.18267	0.111468	0.444796	2.909	2.00072	0.0286318	0.0244639	1.63064	14.8213	0.120129	0.0312376	0.00343012	0.00923306	0.0358134	0.00157366	0.0183724	0.0192796
KST	24.84	121.967	1	33.29	24.33				1963.54	2263.66		51.7282	542.521	0.798449	10.0997	10.0794	83.8935	400.336	1.99981	30.0645	466.112		28.1269	1.19052	0.112122	0.444796	3.83952	2.01812	0.0280412	0.0244639	5.39129	14.6126	0.140923	0.0304873	0.00391666	0.0075211	0.0358134	0.00489776	0.1508	0.0165322
KST	24.84	121.969	1	33.26	24.93				1953.44	2238.99		51.6887	542.155	0.790193	10.0825	10.0954	84.3538	397.35	1.32197	21.2258	465.798		28.2669	1.18645	0.114364	0.444796	4.24606	1.93983	0.028935	0.0244639	1.4319	14.9041	0.103374	0.029633	0.00355176	0.00607843	0.0358134	0.00319854	0.034809	0.0156746
KST	24.836	121.965	1	33.25	24.49				2014.2	2195.53		50.8193	540.116	0.75717	9.90228	10.3244	86.3102	394.455	2.03354	1.20645	464.046		27.1228	1.1698	0.111213	0.444796	2.75542	2.08771	0.0283604	0.0244639	0.321032	14.735	0.0900378	0.0297163	0.0029679	0.0138304	0.0358134	0.00157366	0.00799306	0.0189143
KST	24.8361	121.967	1	33.24	24.63				1938.12	2244.58		53.9016	543.096	0.832651	10.1935	10.146	87.0007	405.674	1.93237	22.3548	466.607		27.7041	1.16319	0.113164	0.444796	2.57474	1.93113	0.0273789	0.0244639	0.315936	14.9185	0.0959161	0.0296746	0.00267598	0.00402023	0.0358134	0.00157366	0.00305904	0.0147376
KST	24.8358	121.969	1	33.24	25				1941.92	2240.4		51.0169	539.017	0.787834	10.0874	10.0262	83.203	394.817	0.913912	26.4516	463.102		26.9761	1.17124	0.112558	0.444796	2.35792	1.95723	0.0273709	0.0244639	0.642063	14.7242	0.0384392	0.0295496	0.0028706	0.00377017	0.0358134	0.00157366	0.0197073	0.0171039
KST	24.8342	121.963	1	33.24	24.62				2119.75	2081.76		54.4944	551.045	0.819678	10.2552	10.0608	85.5046	407.121	1.42651	56.4194	473.436		30.2955	1.19009	0.114194	0.444796	4.27316	2.1747	0.0286238	0.0244639	0.326127	14.8321	0.0812709	0.0304873	0.00270031	0.0379325	0.0358134	0.00157366	0.00135164	0.0299199
KST	24.8329	121.965	1	33.28	24.35				1951.13	2253.46		50.6217	538.39	0.783117	10.0652	10.0715	83.088	384.141	1.85817	9.45806	462.563		27.1164	1.16398	0.112195	0.444796	2.8819	1.94853	0.0282886	0.0244639	0.55034	14.9796	0.277632	0.0292162	0.00503571	0.00496277	0.0358134	0.00157366	0.0258982	0.0157858
KST	24.8315	121.967	1	33.23	24.59				1942.36	2249.93		52.0838	537.605	0.799628	10.1294	10.0209	84.4689	396.265	2.09761	13.0516	461.889		26.8695	1.15956	0.109553	0.444796	3.92986	1.97463	0.0275625	0.0244639	0.51467	14.7026	0.0729314	0.0293829	0.00311387	0.00436647	0.0358134	0.00157366	0.0525473	0.0152299
KST	24.8359	121.958	1	33.31	24.13				2253.22	1826.79		51.6491	539.331	0.79609	10.0775	9.97293	82.8578	394.998	22.0553	29.7097	463.372		27.2838	1.1786	0.111359	0.444796	2.99934	3.05328	0.034864	0.0244639	0.107011	14.6234	0.934561	0.0324254	0.00299223	0.138265	0.0670913	0.00157366	0.00976188	0.0553773
KST	24.8336	121.957	1	33.41	23.61				1973.08	2247.14		50.5031	532.323	0.766605	9.9319	10.0315	83.7784	389.208	0.853209	1.81613	457.351		26.4947	1.14524	0.112219	0.444796	2.80059	1.93113	0.0282328	0.0244639	0.117202	14.958	0.0693362	0.0296746	0.00311387	0.00754034	0.0358134	0.00157366	0.00305904	0.0167545
KST	24.8308	121.957	1	33.3	24.69				1940.94	2282.9		51.8072	541.423	0.784296	10.1318	10.2126	86.4253	394.274	1.54792	0.732258	465.169		28.0645	1.18422	0.113552	0.444796	2.62894	1.98332	0.0276981	0.0244639	0.626776	14.6594	0.0531445	0.0290703	0.00308954	0.00482812	0.0358134	0.00157366	0.0075592	0.0164687
KST	24.8355	121.954	1	33.36	23.07				2078.23	2148.68		53.5855	549.529	0.837369	10.238	10.162	84.8142	396.627	3.55785	38	472.133		28.0152	1.18792	0.11394	0.444796	2.78252	2.01812	0.0315364	0.0244639	0.122298	15.084	0.118345	0.0305707	0.00367339	0.00409717	0.0358134	0.00157366	0.00305904	0.0198196
KST	24.8338	121.953	1	33.25	24.39				1955.59	2275.42		52.2419	518.047	0.899877	9.9862	9.27789	77.7943	381.065	1.08253	106.323	445.085		27.1148	1.16129	0.112268	0.444796	2.08689	1.93113	0.0271635	0.0244639	0.224213	15.0084	0.0498095	0.029237	0.00277329	0.00328928	0.0358134	0.00157366	0.00305904	0.0151347
KST	24.8309	121.951	1	33.31	23.78				1955.41	2258.51		51.412	530.964	0.836189	9.74185	9.55484	76.4133	391.379	1.05218	97.2581	456.183		26.8634	1.13955	0.112219	0.444796	2.02365	1.94853	0.0288711	0.0244639	0.27517	14.9113	0.028213	0.0290911	0.00294358	0.00305845	0.0358134	0.00157366	0.00305904	0.0176756

## Sheet: Yellow Vent
				SPRING 2000 (April)			SUMMER 2009 (July)				SUMMER 2010 (August)				SPRING 2011 (May)				SPRING 2016 (March)					SUMMER 2016 (August)					SUMMER 2017 (August)					SPRING 2018 (May)		WINTER 2018 (October)
METADATA				Sample 3	Sample 4		Sample 3	Sample 4	Sample 5		Sample 3	Sample 4	Sample 5		Sample 3	Sample 4	Sample 5		Sample 3	Sample 4	Sample 5	Sample 6		Sample 3	Sample 4	Sample 5	Sample 6		Sample 3	Sample 4	Sample 5	Sample 6		Sample 6		Sample 6
	Vent Position			Mouth	2 m from vent		Mouth	2 m from vent	Near surface		Mouth	2 m from vent	Near surface		Mouth	2 m from vent	Near surface		Mouth	2 m from vent	Near surface	Back of vent (seabed)		Mouth	2 m from vent	Near surface	Back of vent (seabed)		Mouth	2 m from vent	Near surface	Back of vent (seabed)		Back of vent (seabed)		Back of vent (seabed)
	Latitude			24.836	24.836		24.836	24.836	24.836		24.836	24.836	24.836		24.836	24.836	24.836		24.836	24.836	24.836	24.836		24.836	24.836	24.836	24.836		24.836	24.836	24.836	24.836		24.836		24.836
	Longitude			121.963	121.963		121.963	121.963	121.963		121.963	121.963	121.963		121.963	121.963	121.963		121.963	121.963	121.963	121.963		121.963	121.963	121.963	121.963		121.963	121.963	121.963	121.963		121.963		121.963
	Depth			8	6		9.3	7.3	1		8.5	6.5	1		8	6	1		8	6	1	7.5		8	6	1	7.5		8	6	1	7.5		7.5		7.5
	Temperature			100	24		55	38	27.5		51	29	26.4		37.6	28.36	27.6		38.5	22.01	22.78	28.05		37	29.3	27.54	29.33		55	28.99	28.58	28.25		25.276		23.978
	Salinity			34.1289	34.152		33.234	34.074	33.894		34.4	34.3	34.35		34.203	34.155	33.123		32.81	34.09	33.81	33.7		33.56	33.64	33.76	33.87		33.45	33.76	33.89	33.73		33.34		33.232
	DIC	μmol/kg					4155.94	3847	2606		3228.83	2423.8	2373.04						3615.51	2853.24	2195.54	2241.24		4917.19	3210.7	2984.5	2678.83		3090.6	3053.67	2373.47	2818.14		4989.77		3345.26
	DIC-SD (n=3 to 5)	μmol/kg					190.89	97.32	43.76		120.4	38.54	15.75						98.32	55.65	42.23	26.7		87.65	92.33	34.53	47.97		67.39	53.43	31.98	46.22		955.245		402.398
	TA	μmol/kg					1538.38	1662.11	2127.19		1224.81	1468.92	2199.27						1286.37	2061.04	2036.24	2086.37		962.447	1685.58	1641.57	1684.33		1677.79	1937.22	1876.29	1942.85		2454.58		1873.83
	TA-SD (n=3 to 5)	μmol/kg					23.45	19.87	21.54		23.54	31.43	12.65						25.087	31.4767	24.17	25.08		90.77	1.115	21.404	50.31		3.22	7.47	4.83	3.54		371.608		2080.92
MAJORS (ICP-OES)
	Mg	mM									51.5833		52.9167		52.4	50.2	48.4		52.5818	50.072	52.2115	51.0595		51.1566	50.0186	50.5616	51.697		49.0365	48.547	48.9549	47.935		49.2518		50.2133
	Cl	mM																	539.364	519.426	542.351	530.233		527.996	535.371	523.219	532.952		506.269	504.594	507.065	495.999		506.756		539.023
	Br	µM																	828.536	793.492	841.051	818.523		826.27	808.953	787.925	806.479		759.605	753.389	753.389	744.687		735.155		776.04
	Ca	mM									8.9		10.05		10	10.2	9.2		10.1486	9.81395	10.1699	9.95472		10.173	10.001	9.79562	9.95221		9.47386	9.52573	9.5776	9.39346		9.77312		9.7147
	K	mM									7.84615		10.1026		10.6	10.6	9.5		10.0538	9.72485	10.0565	9.83539		10.3271	9.96934	9.6945	9.87599		9.37148	9.33982	9.36884	9.18415		9.6365		9.42968
	Sr	µM																	84.5986	81.435	84.4815	83.1926		83.6867	82.662	80.9541	82.4342		78.5371	78.8841	79.4624	77.9588		80.326		78.5998
	B	µM																	397.466	384.423	398.483	389.788		477.456	436.801	414.678	435.383		373.159	370.962	372.426	364.553		371.566		375.788
	Na	mM									357.391		465.826		435	444	395		463.342	448.46	463.519	454.174		469.537	459.795	450.359	457.969		432.879	433.93	436.031	427.49		440.816		442.284
MINORS (ICP-MS)
	Li	µM																	22.0875	21.4445	22.8434	22.4974		29.9622	23.1428	25.3134	25.0741		25.9934	24.8494	25.41	24.6038		27.2812		26.3467
	Rb	µM																	1.26241	1.22618	1.29367	1.26817		1.86939	1.35063	1.49411	1.49117		1.03975	1.0341	1.01081	1.02775		1.15609		1.09787
	Mo	nM																	86.561	119.664	124.378	123.591		100.042	103.074	104.762	104.419		104.756	99.2898	108.497	104.814		0.110834		0.101034
	Cd	nM									8.32117		5.31139		14.7	20.4	12.7		2.26846	1.8	1.9	1.6		3.10468	0.613819	1.20985	1.12978		0.202827	0.456361	0.228181	0.219729		0.444796		0.444796
	Sb	nM									11.8481	8.54	6.37192						2.25854	2.80059	2.96485	2.85808		2.85808	3.01413	2.57884	2.71846		2.37147	2.52669	3.06997	2.13001		3.0927		2.17121
	Cs	nM																	11.6399	11.6173	12.7158	13.3478		97.9082	27.2611	48.623	46.7344		3.10497	3.12077	2.82054	3.19977		3.48242		3.08227
	Ba	µM									0.16335		0.07203		0.14	0.13	0.18							0.0530995	0.0440481	0.0481624	0.0478566		0.0385816	0.0392239	0.0376488	0.0370295		0.0361355		0.0489538
	Tl	nM																	0.821985	0.347387	0.352279	0.376743		0.865055	0.177121	0.373324	0.324396		0.010275	0.00513749	0.0154125	0.0154125		0.0244639		0.0244639
	Pb	nM		2.35507	12.0652						60.0878		37.5526		21.7	35.4	34.9		7.16216	0.680502	0.945946	0.492278		16.9402	2.36004	6.25965	5.72394		0.155405	7.84242	2.68074	0.210907		0.139284		0.197035
	U	µM																						10.9571	12.9947	11.8099	13.293		12.1334	11.3268	12.4863	12.1704		14.7385		13.3304
	Al	nM		32.8521	27.2924														703.333	89.8763	106.554	83.4645		751.714	279.715	361.884	346.466		496.201	535.414	457.433	454.505		1.30042		0.448408
	V	nM																	22.4964	23.5957	25.4606	24.2828		34.0806	28.7804	11.9256	28.639		25.5884	25.5668	26.7761	28.1149		0.0295079		0.0242912
	Cr	nM																	6.43133	1.25009	1.51934	1.34625		2.76944	0.903916	0.269251	0.884683		2.01939	1.69628	1.27221	1.6559		0.00356797		0.00139475
	Mn	µM		0.00241348	0.00141166						0.5373		0.23301		0.99	1.42	2.01		1.14371	1.07334	1.2114	1.2414		1.42204	0.363173	0.665068	0.656671		0.118574	0.128565	0.0925043	0.181485		0.293791		0.10207
	Fe	µM		6.65855	7.1957						1.17857				4.81	6.54	3.68		0.46	0.2	0.2	0.2		0.499991	0.160247	0.313887	0.212015		0.0710905	0.0776148	0.0800779	0.0859441		1.40759		0.0892878
	Cu	µM		0.00135327	0.00256116						0.16735	0.114	0.091						0.0358953	0.02	0.02	0.02		0.0058337	0.00646267	0.0112114	0.0183817		0.00276747	0.00143562	0.0031134	0.00179886		0.00292048		0.00157366
	Zn	µM									1.57253	1.31	0.90737						0.554366	0.02	0.02	0.02		0.903885	0.104497	0.246574	0.250918		0.022074	0.0256913	0.0996864	0.0343392		0.0331681		0.00868835
	As	µM									0.55985		0.48344		0.17	0.05	0.61		0.158	0.125213	0.136387	0.084		0.651998	0.416286	0.348	0.091		0.0880676	0.0972191	0.0678586	0.0754124		0.0825921		0.0532704

## Sheet: Source Water
	SUMMER 2017
METADATA			Sample 0	Sample 00
	Where		Cave Water	Cave Water
	Latitude		24.837	24.84
	Longitude		121.964	121.955
	Depth		10 cm	10 cm
	Temperature		n/a	n/a
	Salinity		n/a	n/a
SEAWATER CARBON CHEMISTRY	DIC	μmol/kg	4929.83	4569.36
	DIC-SD (n=3 to 5)	μmol/kg	61.77	88.32
	TA	μmol/kg	4480.05	4342.66
	TA-SD (n=3 to 5)	μmol/kg	93.45	76.37
MAJORS (ICP-OES)
	Mg	mM	6.78842	6.80881
	Cl	mM	4.51707	4.52256
	Br	µM	0.794415	1.16862
	Ca	mM	13.9009	14.0565
	K	mM	0.304731	0.312119
	Sr	µM	16.494	16.7253
	B	µM	11.3705	11.6452
	Si	µM	2481.31	2495.55
	P	µM	0.03	0.03
	Na	mM	5.34876	5.73701
MINORS (ICP-MS)
	Li	µM	7.55602	7.6877
	Rb	µM	0.640891	0.655996
	Mo	nM	3.40173	3.84754
	Cd	nM	0.0591579	0.0591579
	Sb	nM	0.0517407	0.163846
	Cs	nM	29.2641	29.4537
	Ba	µM	0.118932	0.122946
	Tl	nM	0.527876	0.553013
	Pb	nM	0.105454	0.327461
	U	nM	0.0369704	0.0705799
	Al	nM	100.107	242.615
	V	nM	0.345498	0.323904
	Cr	nM	3.07124	3.03083
	Mn	µM	126.004	130.656
	Fe	µM	0.458845	23.0467
	Co	nM	5.20957	2.35194
	Cu	nM	0.674571	0.622681
	Zn	µM	0.0306883	0.0208963
	As	nM	0.392408	0.308321
