# Supplementary material for: Earthquake and typhoon trigger unprecedented transient shifts in shallow hydrothermal vents biogeochemistry
Source: Sci Rep. 2019 Nov 15;9:16926. doi: 10.1038/s41598-019-53314-y (PMC6858458; doi:10.1038/s41598-019-53314-y)
Supplement: Supplementary file 2 — Appendix S2 [file 41598_2019_53314_MOESM2_ESM.xlsx]

## Sheet: Trace elements
Year	Sample ID	Dilution	Li7(LR)	Rb85(LR)	Sr88(LR)	Mo95(LR)	Cd114(LR)	Sb121(LR)	Cs133(LR)	Ba138(LR)	Tl205(LR)	Pb208(LR)	U238(LR)	Al27(MR)	V51(MR)	Cr52(MR)	Mn55(MR)	Fe56(MR)	Cu63(MR)	Zn66(MR)	As75(HR)	Hg202(LR)
			µg/L	µg/L	µg/L	µg/L	µg/L	µg/L	µg/L	µg/L	µg/L	µg/L	µg/L	µg/L	µg/L	µg/L	µg/L	µg/L	µg/L	µg/L	µg/L	µg/L
	LOQ (k=10)		0.5	0.005	0.1	0.1	0.05	0.05	0.005	0.005	0.005	0.005	0.005	1	0.05	0.1	0.05	2	0.1	0.2	0.2	0.4
	Reference Materials
	1640a certif				126.03	45.06	3.961	5.105		151.8	1.619	12	25.35	53	15.05	40.54	40.39	36.8	85.07	55.2	8.075
2017	1640a	1	< 0.5	< 1	138.071	43.9551	3.78432	5.7477	0.026775	156.249	1.56922	13.003	20.9188	55.625	15.8428	42.6888	42.1421	39.9672	85.6257	57.7654	8.5848	< 0.4
2015/2016	1640a	1	< 0.5	< 1	130.712	44.4145	3.8125	4.909	0.028	163.018	1.594	12.0425	24.6565	58.748	14.845	39.783	39.32	37.026	81.156	53.1965	7.864
	LGC6019 certif						0.11					5.2		73		0.78		287	15.4	59.7
2017	LGC6019	25	9.0597	3.0785	370.103	0.87699	0.1368	0.94395	0.026775	80.9603	< 0.005	5.47687	0.3936	76.619	1.1132	0.525525	25.3077	297.927	15.3956	65.554	1.2957	< 0.4
2015/2016	LGC6019	25	7.239	3.031	338.566	0.931	0.1455	0.8245	0.028	77.2085	< 0.005	5.023	0.4645	78.393	0.9738	0.6275	23.875	281.317	15.6675	58.9315	1.1785
	IAPSO certif		187.407	87	7622.94	11			0.27	105			3
2017	IAPSO	25	182.248	91.7955	7513.36	11.0754	0.1273	0.216825	0.24675	109.353	< 0.005	1.012	3.3148	14.461	1.21165	< 0.1	< 0.05	< 2	0.1177	47.0982	1.12613	< 0.4
2015/2016	IAPSO	25	154.498	107.073	8320.76	10.94	0.133	0.2175	0.297	101.084	< 0.005	1.121	3.322	20.6135	1.21815	< 0.1	< 0.05	< 2	0.4695	52.4845	1.191
	NASS-5 certif									5			2.6
2017	NASS-5	25	153.722	78.053	6409.26	9.73896	0.033725	0.170625	0.193725	4.16587	< 0.005	0.008625	2.748	0.4165	1.122	< 0.1	0.54505	< 2	0.176	< 0.2	1.14398	< 0.4
2015/2016	NASS-5	25	129.677	90.519	7137.71	9.243	0.0285	0.185	0.2235	4.987	< 0.005	0.008	2.7995	1.167	1.1826	< 0.1	0.714	< 2	1.084	< 0.2	1.277
2017	GSC 157	25	181.009	89.4625	7122.81	11.0047	0.0589	0.1848	0.244125	4.84208	< 0.005	0.01035	3.1208	0.2545	1.4993	< 0.1	0.05335	< 2	0.0297	0.97295	1.40595	< 0.4
2017	GSP 218	25	184.068	90.5495	7687.28	10.9512	0.02755	0.208425	0.24675	4.0677	< 0.005	0.0138	3.3384	0.071	1.4938	< 0.1	0.011	< 2	-0.00165	0.71555	1.36395	< 0.4
	Replicates
2017	ML1_1	25	188.078	90.612	6723.54	10.8866	0.0342	0.19635	0.2583	4.6872	< 0.005	0.0138	3.372	1.798	1.4476	< 0.1	0.363	< 2	< 0.1	< 0.2	1.3419	< 0.4
2017	ML1_1 Rep 1	25	172.973	89.764	7118.53	11.0782	0.03135	0.1995	0.252	4.60215	< 0.005	0.01495	3.2696	1.693	1.397	< 0.1	0.3597	< 2	< 0.1	< 0.2	1.36395	< 0.4
	Diff %		8.03108	0.935858	5.87479	1.75978	8.33333	1.60428	2.43902	1.81452		8.33333	3.03677	5.83982	3.49544		0.909091				1.64319
2017	ML3_3	25	176.719	87.013	7840.61	10.469	0.0342	0.19215	0.2352	4.4646	< 0.005	0.0759	3.2328	0.496	1.4927	< 0.1	0.2464	< 2	0.396	0.8063	1.3818	< 0.4
2017	ML3_3 Rep 1	25	168.745	86.805	7433.53	11.1312	0.04275	0.19215	0.2415	4.52235	< 0.005	0.0736	3.3208	0.39	1.4729	< 0.1	0.2332	< 2	0.3795	0.8569	1.43115	< 0.4
	Diff %		4.51237	0.239045	5.192	6.32495	25	0	2.67857	1.29351		3.0303	2.7221	21.371	1.32646		5.35714		4.16667	6.27558	3.57143
2017	ML08	25	181.958	89.645	8301.42	9.69153	0.0247	0.3486	0.4851	5.5818	< 0.005	0.0805	2.6952	15.059	1.2859	< 0.1	9.8868	4.8825	0.4433	3.3165	7.95165	< 0.4
2017	ML08 Rep 1	25	179.315	88.783	6983.08	9.31488	0.0266	0.35175	0.48825	5.93355	< 0.005	0.07935	2.76	14.129	1.3002	< 0.1	9.4743	4.70925	0.4169	3.0316	8.21205	< 0.4
	Diff %		1.45248	0.961571	15.8809	3.88638	7.69231	0.903614	0.649351	6.30173		1.42857	2.40427	6.17571	1.11206		4.17223	3.54839	5.95533	8.59038	3.27479
2017	ML20	25	179.392	90.02	7578.94	10.841	0.02945	0.273	0.36645	4.84995	< 0.005	0.0276	3.0896	10.135	1.4399	< 0.1	5.6045	3.60255	< 0.1	0.8591	5.0778	0.1302
2017	ML20 Rep 1	25	170.138	87.723	6936.28	10.934	0.03895	0.26775	0.38115	5.0379	< 0.005	0.02645	3.4144	9.985	1.4102	< 0.1	5.5814	3.5973	< 0.1	0.8437	4.77855	0.1155
	Diff %		5.15821	2.55166	8.4795	0.857854	32.2581	1.92308	4.01146	3.8753		4.16667	10.5127	1.48002	2.06264		0.412169	0.14573		1.79257	5.8933	11.2903
2017	ML32	25	161.5	85.14	7227.33	10.841	0.0323	0.22155	0.273	4.64835	< 0.005	0.0391	3.0456	7.74	1.4509	< 0.1	0.891	0.86625	< 0.1	3.2384	1.31775	3.486
2017	ML32 Rep1	25	175.239	89.03	6623.09	10.4141	0.03515	0.2289	0.29295	4.9413	< 0.005	0.0414	3.0552	7.563	1.3706	< 0.1	0.8976	0.7959	< 0.1	3.4628	1.31565	3.6519
	Diff %		8.50757	4.56895	8.36043	3.93755	8.82353	3.31754	7.30769	6.30224		5.88235	0.315209	2.28682	5.5345		0.740741	8.12121		6.92935	0.159363	4.75904
2017	1640a	25	0.47645	1.247	138.961	43.776	3.84465	5.859	0.02835	157.901	1.63695	13.4412	19.9432	58.197	16.0061	44.1683	43.4665	41.4645	89.7699	59.2086	8.5995	< 0.4
2017	1640a Rep 1	25	0.57005	1.141	137.182	44.1341	3.724	5.6364	0.0252	154.597	1.5015	12.5649	21.8944	53.053	15.6794	41.2094	40.8177	38.4699	81.4814	56.3222	8.5701	< 0.4
	Diff %		19.6453	8.5004	1.28	0.817913	3.13813	3.79928	11.1111	2.09267	8.27453	6.51951	9.78379	8.83894	2.0411	6.69916	6.09389	7.22208	9.23305	4.87497	0.34188
2017	LGC6019	25	9.00575	3.081	369.3	0.80817	0.133	0.92295	0.0273	79.7759	0.02205	5.59705	0.3872	80.625	1.1319	0.55965	26.18	309.715	16.0303	67.9184	1.2138	< 0.4
2017	LGC6019 Rep 1	25	9.11365	3.076	370.907	0.94581	0.1406	0.96495	0.02625	82.1447	0.01155	5.3567	0.4	72.613	1.0945	0.4914	24.4354	286.139	14.7609	63.1895	1.3776	< 0.4
	Diff %		1.19812	0.162285	0.435175	17.0311	5.71429	4.55063	3.84615	2.96932	47.619	4.29423	3.30579	9.93736	3.30418	12.1951	6.66387	7.61238	7.91875	6.96262	13.4948
2017	GSC 157	25	193.658	91.423	7628.52	10.8987	0.05795	0.1911	0.2625	4.9623	< 0.005	0.0115	3.0104	< 1	1.5213	< 0.1	0.055	< 2	< 0.1	1.0197	1.5141	< 0.4
2017	GSC 157 Rep 1	25	168.361	87.502	6617.09	11.1107	0.05985	0.1785	0.22575	4.72185	< 0.005	0.0092	3.2312	< 1	1.4773	< 0.1	0.0517	< 2	< 0.1	0.9262	1.2978	< 0.4
	Diff %		13.0626	4.28886	13.2585	1.94556	3.27869	6.59341	14	4.84554		20	7.33457		2.89226		6			9.16936	14.2857
2017	GSP 218	25	187.548	90.155	7924.55	10.8754	0.03515	0.21945	0.24255	4.0488	< 0.005	0.0138	3.284	< 1	1.529	< 0.1	< 0.05	< 2	< 0.1	0.682	1.3986	< 0.4
	GSP 218 Rep 1	25	180.589	90.944	7450	11.027	0.01995	0.1974	0.25095	4.0866	< 0.005	0.0138	3.3928	< 1	1.4586	< 0.1	< 0.05	< 2	< 0.1	0.7491	1.3293	< 0.4
	Diff %		3.71047	0.875159	5.98835	1.39388	43.2432	10.0478	3.4632	0.93361		0	3.31303		4.60432					9.83871	4.95495
2017	IAPSO	25	191.937	95.892	7957.53	11.3218	0.1292	0.2184	0.2541	110.691	< 0.005	1.0166	3.2048	15.091	1.2375	< 0.1	< 0.05	< 2	0.1265	47.9776	1.0122	< 0.4
2017	IAPSO Rep 1	25	172.559	87.699	7069.2	10.8289	0.1254	0.21525	0.2394	108.015	< 0.005	1.0074	3.4248	13.831	1.1858	< 0.1	< 0.05	< 2	0.1089	46.2187	1.24005	< 0.4
	Diff %		10.0959	8.54399	11.1634	4.35354	2.94118	1.44231	5.78512	2.41795		0.904977	6.8647	8.34935	4.17778					3.66609	22.5104
2017	NASS-5	25	158.183	78.695	6942.24	9.54087	0.0342	0.1785	0.1932	4.2588	< 0.005	0.0092	2.6928	< 1	1.1748	< 0.1	0.5709	< 2	0.1892	0.6952	1.1445	0.44835
2017	NASS-5 Rep 1	25	149.26	77.411	5876.28	9.93705	0.03325	0.16275	0.19425	4.07295	< 0.005	0.00805	2.8032	< 1	1.0692	< 0.1	0.5192	< 2	0.1628	0.5566	1.14345	0.39375
	Diff %		5.64105	1.63162	15.3546	4.15245	2.77778	8.82353	0.543478	4.36391		12.5	4.09982		8.98876		9.05588		13.9535	19.9367	0.0917431	12.178
2015/2016	ML02	25	173.146	106.573	8287.88	10.828	0.104	0.245	0.276	5.01	< 0.005	0.398	3.136	21.848	1.5498	0.252	0.762	6.666	3.218	5.584	1.448
2015/2016	ML02 Rep 1	25	147.777	104.567	8147.2	10.485	0.104	0.247	0.274	5.048	< 0.005	0.421	3.263	20.863	1.4904	0.239	0.71	6.422	3.061	5.354	1.373
	Diff. (%)		14.6518	1.88228	1.69748	3.16771	0	0.816327	0.724638	0.758483		5.77889	4.04974	4.50842	3.83275	5.15873	6.82415	3.66037	4.87881	4.11891	5.17956
2015/2016	ML20	25	171.673	105.939	8201.6	11.198	0.018	0.224	0.372	5.788	< 0.005	0.276	3.108	9.516	1.8981	0.334	14.598	46.777	0.623	2.849	2.48
2015/2016	ML20 Rep 1	25	149.94	105.318	8096.34	10.878	0.031	0.233	0.379	6.042	< 0.005	0.284	3.314	8.947	1.7415	0.309	13.598	44.196	0.549	2.662	2.463
	Diff. (%)		12.6595	0.586186	1.28347	2.85765	72.2222	4.01786	1.88172	4.38839		2.89855	6.62806	5.9794	8.25036	7.48503	6.85025	5.51767	11.878	6.56371	0.685484
2015/2016	ML52	25	237.067	149.957	10603.5	15.178	0.049	0.476	0.393	7.111	< 0.005	0.929	4.14	5.352	2.0907	0.488	1.087	14.476	4.514	7.951	1.848
2015/2016	ML52 Rep 1	25	212.141	149.102	10650.1	14.738	0.058	0.461	0.385	7.306		0.974	4.419	5.067	2.0223	0.476	1.057	14.009	4.33	7.982	1.872
	Diff. (%)		10.5143	0.570163	0.439327	2.89893	18.3673	3.15126	2.03562	2.74223		4.84392	6.73913	5.32511	3.27163	2.45902	2.75989	3.22603	4.07621	0.389888	1.2987
2015/2016	ML158	25	169.726	111.474	8337.57	11.343	0.048	0.237	0.328	7.353	< 0.005	1.233	3.23	29.553	1.5678	1.465	2.414	21.513	3.722	13.68	1.452
2015/2016	ML158 Rep 1	25	154.815	110.157	8204.82	10.954	0.049	0.214	0.328	7.403	< 0.005	1.289	3.37	29.457	1.53	1.461	2.399	21.163	3.638	13.582	1.57
	Diff. (%)		8.78534	1.18144	1.59215	3.42943	2.08333	9.70464	0	0.679995		4.54177	4.33437	0.32484	2.41102	0.273038	0.621375	1.62692	2.25685	0.716374	8.12672
2015/2016	ML173	25	166.304	112.781	8555.22	11.777	0.118	0.271	0.408	8.499	< 0.005	1.546	3.362	47.789	2.0781	1.412	3.315	77.029	8.433	13.937	1.845
2015/2016	ML173 Rep1	25	158.906	112.519	8498.14	11.816	0.118	0.265	0.404	8.602	< 0.005	1.579	3.463	47.721	2.0475	1.404	3.33	75.508	8.217	13.925	1.847
	Diff. (%)		4.44848	0.232309	0.667242	0.331154	0	2.21402	0.980392	1.21191		2.13454	3.00416	0.142292	1.4725	0.566572	0.452489	1.97458	2.56137	0.0861017	0.108401
2015/2016	ML180	25	154.976	107.765	8152.14	10.934	0.045	0.217	0.294	6.428	< 0.005	0.959	3.288	17.001	1.4346	0.175	0.803	3.932	13.413	19.667	1.483
2015/2016	ML180 Rep 1	25	150.93	107.169	8305.2	11.02	0.046	0.241	0.296	6.486	< 0.005	0.968	3.294	17.13	1.4409	0.168	0.805	3.954	13.125	19.592	1.518
	Diff. (%)		2.61073	0.553055	1.87749	0.786537	2.22222	11.0599	0.680272	0.902302		0.938478	0.182482	0.758779	0.439147	4	0.249066	0.559512	2.14717	0.381349	2.36008
	Median Diff (%)		8.03108	0.961571	5.192	2.89893	5.71429	3.31754	2.43902	2.41795	27.9468	4.29423	4.04974	5.58247	3.27163	4.57937	4.17223	3.54839	4.87881	5.57527	3.27479	11.2903

## Sheet: Majors mg
Year	Sample ID	Dilution	Cl	Br	B	Si	P	Mg	Ca	Na	K	Li	Sr	Ba	Al	Mn	Fe
			mg/l	mg/l	mg/l	mg/l	mg/l	mg/l	mg/l	mg/l	mg/l	mg/l	mg/l	mg/l	mg/l	mg/l	mg/l
	LOQ	10	10	0.1	0.3	5	0.1	1	5	5	0.5	0.05	0.1	0.1	0.05	0.04	0.04
	Reference Materials
	IAPSO (ODP TAMU)		19818	67	4.87	2.84		1312	421	11035	407	0.187	7.62	0.018
2018	IAPSO		19818	67	4.87	2.84	0.83	1312	421	11035	407	0.19	7.62	< 0.1	< 0.05	0.03	< 0.04
2016 S	Ref IAPSO frisch	10	19874	66.9	4.773	1.873	0.3783	1322	410.2	11072	398.6	0.1729	7.61	< 0.1	< 0.05	0.0388	< 0.04
2016 S	Ref IAPSO frisch	10	20122	68.7	4.774	1.885	0.4316	1328	408.5	11055	398	0.1728	7.67	< 0.1	< 0.05	0.0397	< 0.04
	Certified							4.62	109	24.7	4.78				0.073		0.287
2018	RiverwaterLGC6019		38.4991	0.127357	0.177816	3.88298	0.536	4.67412	111.913	27.1717	4.66296	< 0.05	0.324991	< 0.1	0.073	< 0.04	0.278413
2016 S	RiverwaterLGC6019	1	35.6	0.1972	0.1821	3.983	0.4961	4.862	109.5	26.47	4.522	< 0.05	0.3322	< 0.1	0.0781	< 0.04	0.2878
2016 S	RiverwaterLGC6019	1	36.79	0.1115	0.1818	4.01	0.51	4.898	109.7	26.56	4.547	< 0.05	0.3336	< 0.1	0.0784	< 0.04	0.2898
	Certified				0.303								0.12603	0.1518	0.053	0.04039	0.0368
2018	NIST 1640a pur fris		< 10	< 0.05	0.30955	5.185	< 0.1	1.129	5.36	< 5	0.639	< 0.05	0.12285	0.14075	0.05475	0.03805	0.03775
2016 S	NIST 1640a pur fris	1	< 10	< 0.05	0.3085	4.974	< 0.1	1.195	5.5	< 5	0.62	< 0.05	0.1273	0.1466	0.0551	0.0384	0.0369
2016 S	NIST 1640a pur fris	1	< 10	< 0.05	0.3111	5.01	< 0.1	1.205	5.5	< 5	0.646	< 0.05	0.127	0.1464	0.0568	0.0383	0.037
	Replicates
2018	Summer_KST_spatial	10	19376	65.9634	4.32118	< 5	1.096	1275.5	414.105	10819.1	395.13	0.183097	7.39999	< 0.1	< 0.05	< 0.04	< 0.04
2018	Summer_KST_spatial	10	19321.4	65.398	4.32021	< 5	0.853	1264.94	412.047	10744.7	392.632	0.17887	7.37971	< 0.1	< 0.05	< 0.04	< 0.04
	Diff %		0.256149	0.807715	0.0221387		22.1715	0.795569	0.511475	0.710067	0.658458	2.50315	0.277725
2018	Summer_KST_spatial	10	19376	65.9634	4.32118	< 5	1.096	1275.5	414.105	10819.1	395.13	0.183097	7.39999	< 0.1	< 0.05	< 0.04	< 0.04
2018	Summer_KST_spatial	10	19418.7	65.5865	4.32901	< 5	0.927	1265.9	407.828	10779.9	394.922	0.177135	7.25807	< 0.1	< 0.05	< 0.04	< 0.04
	Diff %		0.20065	0.538477	0.177109		15.4197	0.723244	1.56	0.374757	0.0548715	3.53009	1.94408
2018	Summer_KST_spatial	10	17881.7	61.2518	4.20773	< 5	< 0.1	1227.48	402.991	10514.4	392.215	0.176376	7.38985	< 0.1	< 0.05	< 0.04	< 0.04
2018	Summer_KST_spatial	10	17835.3	60.8748	4.18327	< 5	< 0.1	1224.6	401.344	10510.3	393.36	0.175401	7.30875	< 0.1	< 0.05	< 0.04	< 0.04
	Diff %		0.235921	0.579898	0.56839			0.225462	0.420465	0.0405914	0.304037	0.599663	1.11242
2018	Summer_yellow vents	10	18499.2	64.0788	4.14708	< 5	0.856	1220.76	395.17	10223.1	378.159	0.170631	7.19725	< 0.1	< 0.05	< 0.04	< 0.04
2018	Summer_yellow vents	10	17894.4	60.7806	4.19501	< 5	0.4346	1204.43	397.434	10189	382.012	0.173774	7.18711	< 0.1	< 0.05	< 0.04	< 0.04
	Diff %		2.97354	4.85025	1.13034		49.229	1.28465	0.589582	0.344421	1.06068	1.99731	0.142774
2018	Summer_white vents	10	17577.9	60.4037	4.12752	< 5	< 0.1	1197.7	395.273	10304.7	386.697	0.175617	7.17697	< 0.1	< 0.05	< 0.04	< 0.04
2018	Summer_white vents	10	19129.5	64.7384	4.13633	< 5	< 0.1	1234.2	395.479	10387.3	379.513	0.168354	7.10601	< 0.1	< 0.05	< 0.04	< 0.04
	Diff %		8.02818	6.76246	0.208597			2.92685	0.0535844	0.828348	1.93435	4.48345	1.00224
2016 S	Ref IAPSO frisch	10	19874	66.9	4.773	1.873	0.3783	1322	410.2	11072	398.6	0.1729	7.61	< 0.1	< 0.05	0.0388	< 0.04
2016 S	Ref IAPSO frisch	10	20122	68.7	4.774	1.885	0.4316	1328	408.5	11055	398	0.1728	7.67	< 0.1	< 0.05	0.0397	< 0.04
	Diff %		1.24786	2.69058	0.0209512	0.640683	14.0893	0.453858	-0.414432	-0.15354	-0.150527	-0.0578369	0.788436			2.31959
2016 S	55 summer offshore	10	19615	66.1	4.365	< 5	0.4768	1296	399.6	10810	387.6	0.1697	7.46	< 0.1	< 0.05	0.0376	< 0.04
2016 S	55 summer offshore	10	19614	67.2	4.405	< 5	0.2926	1298	400.1	10798	388.7	0.1705	7.42	< 0.1	< 0.05	0.036	< 0.04
	Diff %		-0.00509814	1.66415	0.91638		-38.6326	0.154321	0.125125	-0.111008	0.283798	0.47142	-0.536193			-4.25532
2016 S	3-S + 100µL acid	10	19706	66	5.05	3.152	0.53	1311	396.3	10797	398.3	0.239	7.35	< 0.1	< 0.05	0.978	< 0.04
2016 S	3-S + 100L acid	10	19585	68.5	5.05	3.135	0.4685	1305	396.1	10822	398.2	0.2382	7.34	< 0.1	< 0.05	0.979	< 0.04
	Diff %		-0.614026	3.78788	0	-0.53934	-11.6038	-0.457666	-0.0504668	0.231546	-0.0251067	-0.334728	-0.136054			0.102249
2016 S	spatial smpl 14_S	10	19335	65.6	4.323	< 5	0.3353	1269	392.3	10660	381.9	0.17	7.34	< 0.1	< 0.05	< 0.04	0.2845
2016 S	spatial smpl 14_S	10	19345	64.6	4.347	< 5	0.3088	1289	392.6	10642	381.7	0.1679	7.34	< 0.1	< 0.05	< 0.04	0.2862
	Diff %		0.0517197	-1.52439	0.55517		-7.90337	1.57604	0.0764721	-0.168856	-0.0523697	-1.23529	0				0.59754
2016 S	spatial smpl 34_S	10	19053	63.7	4.249	< 5	0.2971	1251	385.3	10470	377.5	0.1636	7.23	< 0.1	< 0.05	< 0.04	< 0.04
2016 S	34_S	10	18993	64.8	4.253	< 5	0.3696	1254	386.4	10466	377.2	0.1658	7.14	< 0.1	< 0.05	< 0.04	< 0.04
	Diff %		-0.314911	1.72684	0.0941398		24.4026	0.239808	0.285492	-0.0382044	-0.0794702	1.34474	-1.24481
	Median Diff (%)		0.218286	1.69549	0.192853	0.0506716	14.7545	0.588551	0.205308	0.136069	0.169335	0.972203	0.21025			0.102249	0.59754

## Sheet: Majors mM
2016 W	Sample ID	Dilution	Mg	Cl	Br	Ca	Na	K	Li	Sr	Ba	B	Si	Al	Mn	Fe	P
			mM	mM	µM	mM	mM	mM	µM	µM	µM	µM	µM	µM	µM	µM	µM
	L.O.Q DF 10		0.02	1	40	0.05	2	0,04	1	0.1	0.04	3	7	1	1	1	15
	Reference Materials
IAPSO	IAPSO		53.9807	558.994	838.548	10.5045	479.996	10.4097	26.9414	87.0007		450.005
2017	IAPSO	10	54	559	840	10.5	475.783	10.4	27	87	< 0.04	450	< 7	< 1	< 1	< 1	30
2016	Ref IAPSO frisch	10	55.1327	591.29	872.34	10.6878	491.025	10.4744	27.4639	87.528	< 0.04	490.241	113.314	< 1	< 1	< 1	19.871
2016	Ref IAPSO frisch	10	55.0915	621.386	912.39	10.4886	483.761	10.1616	25.5666	84.3643	< 0.04	481.917	117.408	< 1	< 1	< 1	35.5161
2017	NIST 1640									1.4	0.0011	28		1.95	0.73	0.65
2017	NIST1640a	1	0.0451881	< 1	< 40	0.140478	< 2	< 0.04	< 1	1.31859	< 0.04	27.1935	176.504	1.91006	0.74	< 1	< 1
2016	NIST 1640a pur fris	1	0.0551738	< 1	< 40	0.140726	< 2	< 0.04	< 1	1.48026	< 0.04	29.285	176.682	2.02222	0.74	< 1	< 1
2016	NIST 1640a pur fris	1	0.0521703	< 1	< 40	0.134488	< 2	< 0.04	< 1	1.43689	< 0.04	28.3508	177.928	2.11481	0.710909	< 1	< 1
2017	Riverwater		0.19			3	1							2.7		5.14
2017	RiverwaterLGC6019	10	0.17685	1.0127	< 40	2.81908	< 2	0.119571	< 1	3.7869	< 0.04	16.5889	141.438	2.77242	0.378595	5.12086	16.2903
2016	RiverwaterLGC6019	1	0.20181	0.966632	< 40	2.72219	< 2	0.114634	< 1	3.77425	0.53886	17.103	141.616	2.78148	0.387273	5.21397	15.3613
2016	RiverwaterLGC6019	1	0.20144	1.02756	< 40	2.65732	< 2	0.113406	< 1	3.72404	0.523568	16.6405	141.581	2.92593	0.394545	5.28021	16.2581
	Replicates
2016	Probe No 2	10	51.4709	528.976	819.775	9.97331	455.857	9.8974	26.4992	83.1926	< 0.04	423.273	84.7277	< 1	1.23091	< 1	5.96774
2016	Probe No 2	10	51.1829	527.245	818.523	10.0078	455.148	9.8974	26.2901	82.7239	< 0.04	420.775	83.7309	< 1	1.20909	< 1	8.23226
	Diff(%)		0.559552	0.32728	0.152672	0.346205	0.155461	0	0.788835	0.56338		0.590035	1.17647		1.77253		37.9459
